# Supplementary material
Source: PubMed Central journal article supplement (PMC4669054)
Supplement: NIHMS705323-supplement-1.pdf [file NIHMS705323-supplement-1.pdf]

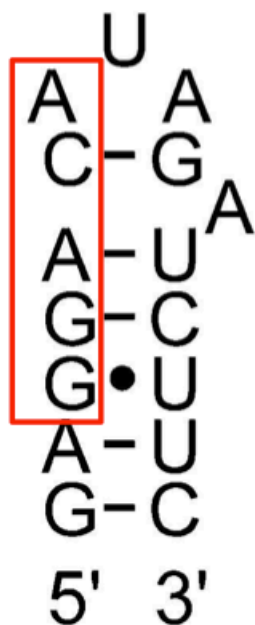

| BMRB 18239 1_1 |     |          |      |           |
|----------------|-----|----------|------|-----------|
| 1-16           | G C |          | -    | -         |
| 2-15           | A U |          | -    | -         |
| 3-14           | G U | mismatch |      | -         |
| 4-13           | G C |          | -    | -         |
| 5-12           | A U |          | -    | 3prime-nc |
| 6-10           | C G |          | -    | 5prime-nc |
| 7-0            | A - |          | loop | -         |
| 8-0            | U - |          | loop | -         |
| 9-0            | A - |          | loop | -         |
| 10-6           | G C |          | -    | -         |
| 11-0           | A - |          | loop | -         |
| 12-5           | U A |          | -    | -         |
| 13-4           | C G |          | -    | -         |
| 14-3           | U G | mismatch |      | -         |
| 15-2           | U A |          | -    | -         |
| 16-1           | C G |          | -    | -         |

Attribute Example:

**5 Pp,GC,AU,CG,P-,-,-,-,-,3prime-nc**

**7 Pp,CG,A-,U-,P-,-,-,-,-,-**

**Figure S1.** Attribute description. An example of the secondary structure of a small RNA along with the descriptive template that was automatically calculated, and the actual attributes descriptions that are used for residues 5 and 7. The terms mismatch and loop in the template file are only used to aid in human examination of the file. The existence of mismatches and loops is implicit in the base-pairing attributes. The first five (of the comma separated values) represent the sequence and base-pairing. The next five (which are all empty in this example) represent other attributes. For example, bases in tetraloops have specific positional attributes (gnra1, gnra2, ...). The attribute description is converted into a representative pattern of 174 binary digits prior to being input into the SVR program.

**Table S1** Outliers<sup>1</sup>

| Atom | Base | ID           | Measured | Predicted | Delta  | Attributes                                                                |
|------|------|--------------|----------|-----------|--------|---------------------------------------------------------------------------|
| H8   | A    | 4750.1.1.23  | 7.615    | 8.153     | 0.538  | (P-,C-,A-,GC,pP,-,-,-,-,-,-)                                              |
| H8   | A    | 4780.1.1.12  | 8.633    | 8.103     | -0.53  | (p-,G-,AU,GC,p,-,-,-,-,-,multiplet,-)                                     |
| H8   | A    | 4894.1.1.23  | 7.045    | 7.982     | 0.937  | (Pp,CG,AU,GC,pP,-,-,-,-,-,-)                                              |
| H8   | A    | 5007.1.1.25  | 7.533    | 8.14      | 0.607  | (p-,G-,A-,GC,pP,-,-,-,-,-,-)                                              |
| H8   | A    | 5919.1.1.36  | 7.393    | 8.045     | 0.652  | (P-,A-,A-,U-,P,-,-,-,-,-,-)                                               |
| H8   | A    | 15257.1.1.12 | 9.187    | 8.198     | -0.989 | (P-,G-,A-,U-,Pp,-,-,-,-,-,-)                                              |
| H8   | A    | 15417.1.1.22 | 8.53     | 7.994     | -0.536 | (Pp,CG,A-,A-,pP,-,-,-,-,-,-)                                              |
| H8   | A    | 16920.1.1.4  | 8.875    | 8.298     | -0.577 | (P-,G-,A-,A-,p,-,-,-,-,-,protein)                                         |
| H8   | A    | 16952.1.1.7  | 7.494    | 8.137     | 0.643  | (P-,G-,AU,GC,pP,-,-,-,-,-,-)                                              |
| H8   | A    | 17106.1.1.25 | 8.788    | 8.231     | -0.557 | (pP,UA,A-,U-,P,-,-,-,-,-,-)                                               |
| H8   | A    | 17106.1.1.27 | 8.728    | 8.015     | -0.713 | (P-,U-,A-,A-,P,-,-,-,-,-,-)                                               |
| H8   | A    | 17106.1.1.28 | 8.678    | 8.01      | -0.668 | (p-,A-,A-,A-,P,-,-,-,-,-,-)                                               |
| H8   | A    | 17316.1.1.37 | 7.482    | 7.987     | 0.505  | (pP,G-,A-,A-,p,-,-,-,-,-,-)                                               |
| H8   | A    | 19534.1.1.10 | 8.986    | 8.348     | -0.638 | (P-,G-,A-,U-,P,-,-,-,-,-,protein)                                         |
| H8   | A    | 19534.1.1.29 | 9.203    | 8.478     | -0.725 | (P-,G-,A-,C-,Pp,-,-,-,-,-,protein)                                        |
| H8   | A    | 19534.1.1.41 | 9.259    | 8.389     | -0.87  | (P-,G-,A-,C-,P,-,-,-,-,-,protein)                                         |
| H8   | A    | 19534.1.1.51 | 9.06     | 8.305     | -0.755 | (P-,G-,A-,A-,Pp,-,-,-,-,-,protein)                                        |
| H8   | A    | 19534.1.1.66 | 9.115    | 8.478     | -0.637 | (P-,G-,A-,C-,Pp,-,-,-,-,-,protein)                                        |
| H8   | A    | 19544.1.1.13 | 8.999    | 8.151     | -0.848 | (P-,G-,A-,U-,P,-,-,-,-,-,-)                                               |
| H8   | A    | 19546.1.1.13 | 9.18     | 8.316     | -0.864 | (P-,G-,A-,C-,Pp,-,-,-,-,-,-)                                              |
| H8   | A    | 19547.1.1.12 | 9.04     | 8.135     | -0.905 | (P-,G-,A-,A-,Pp,-,-,-,-,-,-)                                              |
| H8   | A    | 19548.1.1.12 | 9.091    | 8.316     | -0.775 | (P-,G-,A-,C-,Pp,-,-,-,-,-,-)                                              |
| H8   | A    | 19549.1.1.6  | 9.117    | 8.197     | -0.92  | (P-,G-,A-,C-,P,-,-,-,-,-,-)                                               |
| H8   | G    | 4120.1.1.32  | 7.637    | 7.153     | -0.484 | (Pp,GC,GC,U-,p,-,-,-,-,-,-)                                               |
| H8   | G    | 4346.1.1.24  | 7.208    | 7.694     | 0.486  | (pP,A-,G-,A-,P,-,-,-,-,-,protein)                                         |
| H8   | G    | 4750.1.1.8   | 7.255    | 7.746     | 0.491  | (p-,A-,G-,GA,pP,-,-,-,-,-,-)                                              |
| H8   | G    | 5007.1.1.9   | 6.823    | 7.426     | 0.603  | (P-,A-,GC,GC,Pp,-,-,-,-,-,-)                                              |
| H8   | G    | 5193.1.1.8   | 8.458    | 7.953     | -0.505 | (P-,U-,G-,G-,pP,-,-,-,-,-,-)                                              |
| H8   | G    | 5278.1.1.21  | 8.088    | 7.517     | -0.571 | (Pp,AU,G-,A-,P-,pseudoknot,pseudoknot,pseudoknot,pseudoknot,pseudoknot,-) |
| H8   | G    | 5553.1.1.5   | 8.191    | 7.448     | -0.743 | (pP,A-,GC,AU,Pp,-,-,-,-,-,-)                                              |
| H8   | G    | 5919.1.1.39  | 7.293    | 7.836     | 0.543  | (p-,A-,G-,CG,pP,-,-,-,-,-,-)                                              |
| H8   | G    | 6076.1.1.28  | 8.056    | 7.357     | -0.699 | (pP,GC,GC,UA,pP,-,-,-,-,-,5prime-nc)                                      |
| H8   | G    | 6077.1.1.28  | 8.052    | 7.357     | -0.695 | (pP,GC,GC,UA,pP,-,-,-,-,-,5prime-nc)                                      |
| H8   | G    | 6094.1.1.49  | 7.965    | 7.315     | -0.65  | (pP,GC,GC,AU,Pp,-,-,-,-,-,5prime-nc)                                      |
| H8   | G    | 7230.1.1.7   | 6.837    | 7.458     | 0.621  | (P-,A-,GC,CG,pP,-,-,-,-,-,-)                                              |
| H8   | G    | 7230.1.1.7   | 6.837    | 7.458     | 0.621  | (P-,A-,GC,CG,pP,-,-,-,-,-,-)                                              |
| H8   | G    | 10014.1.1.1  | 7.659    | 8.137     | 0.478  | (-,GC,GC,pP,-,-,-,-,-,-)                                                  |

|    |   |              |       |       |        |                                                             |
|----|---|--------------|-------|-------|--------|-------------------------------------------------------------|
| H8 | G | 11489.1.1.1  | 7.42  | 7.92  | 0.5    | (-,G-,G-,P-,multiplet,multiplet,multiplet,-)                |
| H8 | G | 15257.1.1.11 | 8.613 | 7.892 | -0.721 | (p-,G-,G-,A-,p-,,-,-,-,-)                                   |
| H8 | G | 15257.1.1.14 | 7.103 | 7.683 | 0.58   | (P-,U-,GC,AU,Pp-,,-,-,-,-)                                  |
| H8 | G | 15319.1.1.13 | 6.94  | 7.426 | 0.486  | (P-,A-,GC,GC,Pp-,,-,-,-,-)                                  |
| H8 | G | 15342.1.1.13 | 6.941 | 7.426 | 0.485  | (P-,A-,GC,GC,Pp-,,-,-,-,-)                                  |
| H8 | G | 15417.1.1.12 | 7.765 | 7.234 | -0.531 | (Pp,AU,G-,A-,P-,,-,-,-,-)                                   |
| H8 | G | 16953.1.1.6  | 7.14  | 7.651 | 0.511  | (P-,G-,GU,CG,pP-,,-,-,-,-)                                  |
| H8 | G | 17408.1.1.12 | 7.731 | 7.215 | -0.516 | (Pp,AU,GC,CG,p-,,-,-,-,-)                                   |
| H8 | G | 17504.1.1.25 | 7.113 | 7.681 | 0.568  | (p-,G-,G-,G-,p-,multiplet,multiplet,multiplet,-,-)          |
| H8 | G | 18034.1.1.17 | 7.171 | 7.765 | 0.594  | (pP,UG,GC,GC,Pp-,,-,-,-,-)                                  |
| H8 | G | 18034.1.1.18 | 7.86  | 7.226 | -0.634 | (pP,GC,GC,GC,pP-,,-,-,-,-)                                  |
| H8 | G | 18035.1.1.17 | 7.211 | 7.765 | 0.554  | (pP,UG,GC,GC,Pp-,,-,-,-,-)                                  |
| H8 | G | 18035.1.1.18 | 7.894 | 7.226 | -0.668 | (pP,GC,GC,GC,pP-,,-,-,-,-)                                  |
| H8 | G | 18035.1.1.19 | 7.676 | 7.177 | -0.499 | (Pp,GC,GC,UA,pP-,,-,-,-,-)                                  |
| H8 | G | 18036.1.1.17 | 7.199 | 7.765 | 0.566  | (pP,UG,GC,GC,Pp-,,-,-,-,-)                                  |
| H8 | G | 18036.1.1.18 | 7.91  | 7.226 | -0.684 | (pP,GC,GC,GC,pP-,,-,-,-,-)                                  |
| H8 | G | 18079.1.1.8  | 7.103 | 7.636 | 0.533  | (pP,G-,GC,CG,p-,,-,-,-,tetral,-)                            |
| H8 | G | 18079.1.1.17 | 7.066 | 7.644 | 0.578  | (pP,U-,GC,GC,Pp-,,-,-,-,-)                                  |
| H8 | G | 19018.1.1.1  | 7.625 | 8.137 | 0.512  | (-,GC,GC,pP-,,-,-,-,-)                                      |
| H8 | G | 19290.1.1.9  | 6.888 | 8.05  | 1.162  | (P-,U-,G-,A-,P-,,-,-,-,-,protein)                           |
| H8 | G | 19534.1.1.9  | 8.628 | 8.019 | -0.609 | (p-,G-,G-,A-,p-,,-,-,-,-,protein)                           |
| H8 | G | 19534.1.1.13 | 6.706 | 7.655 | 0.949  | (p-,A-,GC,AU,pP-,,-,-,-,-,protein)                          |
| H8 | G | 19534.1.1.28 | 8.608 | 8.129 | -0.479 | (P-,G-,G-,A-,p-,,-,-,-,-,protein)                           |
| H8 | G | 19534.1.1.31 | 7.068 | 7.572 | 0.504  | (P-,C-,GC,AU,pP-,,-,-,-,-,protein)                          |
| H8 | G | 19534.1.1.68 | 6.989 | 7.572 | 0.583  | (P-,C-,GC,AU,pP-,,-,-,-,-,protein)                          |
| H8 | G | 19544.1.1.12 | 8.638 | 7.892 | -0.746 | (p-,G-,G-,A-,p-,,-,-,-,-)                                   |
| H8 | G | 19544.1.1.16 | 6.691 | 7.587 | 0.896  | (p-,A-,GC,AU,pP-,,-,-,-,-)                                  |
| H8 | G | 19546.1.1.12 | 8.631 | 7.943 | -0.688 | (P-,G-,G-,A-,p-,,-,-,-,-)                                   |
| H8 | G | 19547.1.1.11 | 8.478 | 7.882 | -0.596 | (P-,G-,G-,A-,P-,,-,-,-,-)                                   |
| H8 | G | 19548.1.1.11 | 8.485 | 7.943 | -0.542 | (P-,G-,G-,A-,p-,,-,-,-,-)                                   |
| H8 | G | 19549.1.1.5  | 8.425 | 7.943 | -0.482 | (P-,G-,G-,A-,p-,,-,-,-,-)                                   |
| H2 | A | 4750.1.1.19  | 6.845 | 7.483 | 0.638  | (Pp,GC,AU,AG,P-,gnra5-,,-,-,-,-)                            |
| H2 | A | 4750.1.1.23  | 6.685 | 7.949 | 1.264  | (P-,C-,A-,GC,pP-,,-,-,-,-)                                  |
| H2 | A | 4894.1.1.23  | 7.995 | 7.046 | -0.949 | (Pp,CG,AU,GC,pP-,,-,-,-,-)                                  |
| H2 | A | 5256.1.1.11  | 7.204 | 7.861 | 0.657  | (P-,A-,A-,AU,pP-,,-,-,-,-)                                  |
| H2 | A | 5614.1.1.4   | 8.197 | 7.301 | -0.896 | (Pp,CG,A-,A-,Pp-,,-,-,-,-)                                  |
| H2 | A | 5919.1.1.11  | 7.283 | 8.024 | 0.741  | (P-,U-,A-,CG,pP-,,-,-,-,-)                                  |
| H2 | A | 5919.1.1.38  | 7.203 | 7.903 | 0.7    | (P-,U-,A-,G-,pP-,,-,-,-,-)                                  |
| H2 | A | 6509.1.1.21  | 6.937 | 7.621 | 0.684  | (p-,A-,A-,A-,Pp-,,-,-,-,pseudoknot,pseudoknot,-,-)          |
| H2 | A | 6652.1.1.21  | 6.961 | 7.662 | 0.701  | (Pp,G-,A-,A-,P-,multiplet,multiplet,gnra3,multiplet,-)      |
| H2 | A | 6652.1.1.37  | 6.862 | 7.556 | 0.694  | (pP,U-,A-,A-,P-,multiplet,multiplet,tetra2,tetra3,tetra4,-) |

|    |   |              |       |       |        |                                                                           |
|----|---|--------------|-------|-------|--------|---------------------------------------------------------------------------|
| H2 | A | 11489.1.1.6  | 9.043 | 8.402 | -0.641 | (P-,G-,A-,G-,P-,multiplet,multiplet,multiplet,multiplet,multiplet,-)      |
| H2 | A | 15113.1.1.49 | 7.234 | 7.995 | 0.761  | (P-,U-,A-,G-,Pp,-,-,-,-,-)                                                |
| H2 | A | 15417.1.1.22 | 8.652 | 7.451 | -1.201 | (Pp,CG,A-,A-,pP,-,-,-,-,-)                                                |
| H2 | A | 16952.1.1.7  | 6.713 | 7.516 | 0.803  | (P-,G-,AU,GC,pP,-,-,-,-,-)                                                |
| H2 | A | 17106.1.1.25 | 8.478 | 7.562 | -0.916 | (pP,UA,A-,U-,P,-,-,-,-,-)                                                 |
| H2 | A | 17316.1.1.23 | 7.052 | 7.993 | 0.941  | (P-,U-,A-,GC,Pp,-,-,-,-,-)                                                |
| H2 | A | 17504.1.1.14 | 7.407 | 8.167 | 0.76   | (P-,A-,A-,G-,P-,multiplet,-,multiplet,multiplet,-)                        |
| H2 | A | 17941.1.1.23 | 7.206 | 7.839 | 0.633  | (Pp,U-,A-,GC,Pp,-,-,-,-,-)                                                |
| H2 | A | 17961.1.1.5  | 6.881 | 7.928 | 1.047  | (pP,AU,A-,UA,Pp,-,-,-,-,-)                                                |
| H2 | A | 18503.1.1.43 | 7.067 | 7.693 | 0.626  | (pP,U-,A-,A-,Pp,-,-,-,-,-)                                                |
| H2 | A | 19260.1.1.24 | 6.077 | 6.713 | 0.636  | (pP,CG,AU,AU,Pp,multiplet,-,multiplet,-,5prime-nc)                        |
| H2 | A | 19534.1.1.48 | 8.406 | 7.773 | -0.633 | (Pp,CG,A-,G-,P,-,-,-,-,-,protein)                                         |
| H2 | A | 19547.1.1.9  | 8.39  | 7.668 | -0.722 | (Pp,CG,A-,G-,P,-,-,-,-,-)                                                 |
| H2 | A | 19698.1.1.36 | 8.821 | 8.019 | -0.802 | (P-,C-,A-,C-,Pp,-,-,-,-,-)                                                |
| H5 | C | 4120.1.1.19  | 5.917 | 5.46  | -0.457 | (pP,CG,CG,CG,p,-,-,-,-,-,tetra1,-)                                        |
| H5 | C | 4867.2.2.10  | 5.203 | 5.813 | 0.61   | (P-,U-,C-,C-,p,-,-,-,-,-,protein)                                         |
| H5 | C | 4867.2.2.12  | 4.853 | 5.662 | 0.809  | (p-,C-,C-,G-,P,-,-,-,-,-,protein)                                         |
| H5 | C | 4894.1.1.22  | 7.045 | 5.229 | -1.816 | (Pp,AU,CG,AU,Pp,-,-,-,-,-)                                                |
| H5 | C | 5278.1.1.16  | 6.178 | 5.673 | -0.505 | (pP,U-,CG,CG,Pp,pseudoknot,-pseudoknot,pseudoknot,pseudoknot,-)           |
| H5 | C | 5278.1.1.25  | 4.928 | 5.373 | 0.445  | (P-,A-,C-,A-,P-,pseudoknot,pseudoknot,pseudoknot,pseudoknot,pseudoknot,-) |
| H5 | C | 5919.1.1.7   | 4.933 | 5.518 | 0.585  | (P-,A-,C-,G-,P,-,-,-,-,-)                                                 |
| H5 | C | 10018.1.1.8  | 5.955 | 5.47  | -0.485 | (pP,AU,C-,GC,p,-,-,-,-,-)                                                 |
| H5 | C | 15342.1.1.5  | 6.48  | 5.481 | -0.999 | (pP,CG,CG,C-,p,-,-,-,-,-)                                                 |
| H5 | C | 15417.1.1.17 | 6.133 | 5.584 | -0.549 | (Pp,CG,C-,C-,p,-,-,-,-,-)                                                 |
| H5 | C | 15857.2.2.1  | 5.054 | 5.559 | 0.505  | (-,CG,AU,Pp,-,-,kissing,kissing,kissing,-)                                |
| H5 | C | 17504.1.1.5  | 4.345 | 5.136 | 0.791  | (pP,GC,CG,G-,Pp,-,-,-,multiplet,-,protein)                                |
| H5 | C | 17504.1.1.22 | 6.278 | 5.694 | -0.584 | (P-,G-,C-,U-,P-,multiplet,multiplet,-,multiplet,-)                        |
| H5 | C | 17504.1.1.30 | 4.53  | 5.394 | 0.864  | (p-,GU,CG,GC,pP,-,-,-,-,-,protein)                                        |
| H5 | C | 18079.1.1.13 | 5.171 | 5.652 | 0.481  | (P-,A-,C-,GC,pP,tetra2,tetra3,tetra4,tetra5,-,-)                          |
| H5 | C | 18893.1.1.1  | 5.171 | 5.956 | 0.785  | (-,CG,AU,Pp,-,-,-,-,-,5prime-nc)                                          |
| H5 | C | 18893.1.1.1  | 5.171 | 5.956 | 0.785  | (-,CG,AU,Pp,-,-,-,-,-,5prime-nc)                                          |
| H5 | C | 18974.1.1.15 | 5.061 | 5.6   | 0.539  | (P-,A-,CG,GC,Pp,-,-,-,-,-)                                                |
| H5 | C | 19260.1.1.37 | 6.157 | 5.666 | -0.491 | (p-,GC,C-,AU,Pp,-,multiplet,-,multiplet,multiplet,-)                      |
| H5 | C | 19382.1.1.3  | 4.21  | 5.877 | 1.667  | (P-,U-,C-,A-,P,-,-,-,-,-,protein)                                         |
| H5 | C | 19546.1.1.5  | 6.038 | 5.52  | -0.518 | (Pp,CG,CG,AU,pP,-,-,-,-,-)                                                |
| H5 | C | 19726.1.1.4  | 6.625 | 5.782 | -0.843 | (p-,A-,C-,U-,p,-,-,-,-,-,protein)                                         |
| H5 | U | 4120.1.1.36  | 6.287 | 5.549 | -0.738 | (p-,A-,UA,CG,Pp,-,-,-,-,-)                                                |
| H5 | U | 4345.1.1.28  | 4.92  | 5.609 | 0.689  | (P-,A-,UG,GC,Pp,-,-,-,-,-,protein)                                        |
| H5 | U | 4346.1.1.28  | 4.868 | 5.609 | 0.741  | (P-,A-,UG,GC,Pp,-,-,-,-,-,protein)                                        |

|    |   |              |       |       |        |                                                                              |
|----|---|--------------|-------|-------|--------|------------------------------------------------------------------------------|
| H5 | U | 4894.1.1.14  | 7.785 | 5.726 | -2.059 | (pP,CG,U-,U-,p-,,-,,-,uncg1,uncg2,uncg3,-)                                   |
| H5 | U | 5919.1.1.10  | 4.963 | 5.676 | 0.713  | (P-,A-,U-,A-,pP-,,-,,-,,-)                                                   |
| H5 | U | 5919.1.1.37  | 4.863 | 5.595 | 0.732  | (P-,A-,U-,A-,P-,,-,,-,,-)                                                    |
| H5 | U | 6115.1.1.10  | 4.98  | 5.506 | 0.526  | (Pp,UA,UG,G-,P-,,-,,-,,-)                                                    |
| H5 | U | 6477.1.1.13  | 5.342 | 5.846 | 0.504  | (p-,C-,U-,C-,Pp-,,-,,-,,-)                                                   |
| H5 | U | 15113.1.1.39 | 6.381 | 5.619 | -0.762 | (Pp,A-,U-,G-,P-,,-,,-,,-,tetra1,tetra2,tetra3,tetra4,protein)                |
| H5 | U | 15745.1.1.14 | 5.936 | 5.432 | -0.504 | (P-,GC,U-,CG,pP-,,-,,-,,-)                                                   |
| H5 | U | 17106.1.1.14 | 6.138 | 5.385 | -0.753 | (Pp,GC,U-,U-,P-,,-,,-,,-)                                                    |
| H5 | U | 17504.1.1.3  | 4.657 | 5.427 | 0.77   | (Pp,CG,UA,GC,pP-,,-,,-,,-,protein)                                           |
| H5 | U | 17504.1.1.8  | 4.345 | 5.2   | 0.855  | (P-,GC,UG,G-,p-,,-,,-,,-,,-,,-,,-,,-,,-,,-,,-,,-)                            |
| H5 | U | 19260.1.1.35 | 6.053 | 5.527 | -0.526 | (p-,GC,U-,GC,p-,,-,,-,,-,,-,,-,,-,,-,,-,,-,,-,,-)                            |
| H5 | U | 19382.1.1.2  | 4.175 | 5.602 | 1.427  | (-,A-,U-,C-,P-,,-,,-,,-,,-,,-,,-,,-,,-,,-,,-,,-,protein)                     |
| H5 | U | 19662.1.1.8  | 4.814 | 5.461 | 0.647  | (Pp,GC,U-,U-,Pp-,,-,,-,,-,,-)                                                |
| H5 | U | 19662.1.1.8  | 4.814 | 5.461 | 0.647  | (Pp,GC,U-,U-,Pp-,,-,,-,,-,,-)                                                |
| H5 | U | 19698.1.1.11 | 4.991 | 5.639 | 0.648  | (p-,U-,U-,A-,P-,,-,,-,,-,,-)                                                 |
| H5 | U | 19698.1.1.43 | 4.887 | 5.406 | 0.519  | (Pp,A-,U-,A-,P-,,-,,-,,-,,-,,-,,-,,-,,-,,-,,-,,-)                            |
| H6 | C | 4750.1.1.22  | 8.055 | 7.673 | -0.382 | (PP,G-,C-,A-,Pp-,,-,,-,,-,,-)                                                |
| H6 | C | 4867.2.2.4   | 7.163 | 7.525 | 0.362  | (Pp,CG,CG,GA,Pp-,,-,,-,,-,,-,,-,,-,,-,,-)                                    |
| H6 | C | 4867.2.2.10  | 5.653 | 7.712 | 2.059  | (P-,U-,C-,C-,p-,,-,,-,,-,,-,,-,,-,,-,,-,,-,,-,,-,protein)                    |
| H6 | C | 4867.2.2.12  | 6.953 | 7.571 | 0.618  | (p-,C-,C-,G-,P-,,-,,-,,-,,-,,-,,-,,-,,-,,-,,-,,-,protein)                    |
| H6 | C | 4894.1.1.22  | 7.995 | 7.396 | -0.599 | (Pp,AU,CG,AU,Pp-,,-,,-,,-,,-)                                                |
| H6 | C | 5278.1.1.16  | 8.208 | 7.86  | -0.348 | (pP,U-,CG,CG,Pp,pseudoknot,-,pseudoknot,pseudoknot,pseudoknot,-)             |
| H6 | C | 5632.1.1.20  | 6.966 | 7.402 | 0.436  | (Pp,AU,C-,U-,p-,,-,,-,,-,,-,,-,,-,,-,,-,,-,,-,,-,,-,,-,,-)                   |
| H6 | C | 5919.1.1.7   | 7.053 | 7.511 | 0.458  | (P-,A-,C-,G-,P-,,-,,-,,-,,-)                                                 |
| H6 | C | 6477.1.1.24  | 8.277 | 7.922 | -0.355 | (pP,UA,CG,AU,Pp,multiplet,multiplet,multiplet,multiplet,multiplet,5prime-nc) |
| H6 | C | 6477.1.1.27  | 7.181 | 7.667 | 0.486  | (Pp,GC,CG,CG,pP,multiplet,multiplet,-,,-,,-)                                 |
| H6 | C | 6509.1.1.17  | 8.068 | 7.709 | -0.359 | (pP,AU,CG,UA,p-,,-,,-,,-,,-,,-,,-,,-,,-,,-,,-,,-,,-,,-,,-)                   |
| H6 | C | 15745.1.1.15 | 7.516 | 7.898 | 0.382  | (Pp,U-,CG,UA,Pp-,,-,,-,,-,,-)                                                |
| H6 | C | 15857.2.2.1  | 7.416 | 7.773 | 0.357  | (-,,-,CG,AU,Pp-,,-,,-,,-,,-,,-,,-,,-,,-,,-,,-,,-,,-,,-,,-)                   |
| H6 | C | 16654.1.1.12 | 7.07  | 7.684 | 0.614  | (p-,A-,C-,CG,pP-,,-,,-,,-,,-)                                                |
| H6 | C | 16655.1.1.12 | 7.107 | 7.684 | 0.577  | (p-,A-,C-,CG,pP-,,-,,-,,-,,-)                                                |
| H6 | C | 17106.1.1.10 | 8.408 | 8.052 | -0.356 | (p-,U-,C-,UA,Pp-,,-,,-,,-,,-)                                                |
| H6 | C | 17106.1.1.23 | 8.358 | 7.895 | -0.463 | (pP,UA,CG,UA,P-,,-,,-,,-,,-)                                                 |
| H6 | C | 17106.1.1.33 | 7.258 | 7.677 | 0.419  | (P-,A-,CG,UA,Pp-,,-,,-,,-,,-)                                                |
| H6 | C | 17504.1.1.30 | 7.078 | 7.649 | 0.571  | (p-,GU,CG,GC,pP-,,-,,-,,-,,-,,-,,-,,-,,-,,-,,-,,-,protein)                   |
| H6 | C | 18892.1.1.19 | 7.096 | 7.629 | 0.533  | (Pp,A-,CG,UA,Pp-,,-,,-,,-,,-)                                                |
| H6 | C | 18893.1.1.1  | 7.533 | 7.999 | 0.466  | (-,,-,CG,AU,Pp-,,-,,-,,-,,-,5prime-nc)                                       |
| H6 | C | 18893.1.1.1  | 7.533 | 7.999 | 0.466  | (-,,-,CG,AU,Pp-,,-,,-,,-,,-,5prime-nc)                                       |
| H6 | U | 4120.1.1.36  | 7.347 | 7.817 | 0.47   | (p-,A-,UA,CG,Pp-,,-,,-,,-,,-)                                                |

|     |   |              |       |       |        |                                                                           |
|-----|---|--------------|-------|-------|--------|---------------------------------------------------------------------------|
| H6  | U | 4750.1.1.10  | 7.405 | 7.779 | 0.374  | (P-,GA,UA,CG,pP,-,-,-,-,-)                                                |
| H6  | U | 4894.1.1.14  | 5.765 | 7.728 | 1.963  | (pP,CG,U-,U-,p,-,-,-,uncg1,uncg2,uncg3,-)                                 |
| H6  | U | 5371.1.1.19  | 7.269 | 7.641 | 0.372  | (Pp,A-,U-,GC,Pp,-,-,-,-,-)                                                |
| H6  | U | 5919.1.1.10  | 7.163 | 7.633 | 0.47   | (P-,A-,U-,A-,pP,-,-,-,-,-)                                                |
| H6  | U | 6320.1.1.23  | 7.254 | 7.641 | 0.387  | (Pp,A-,U-,GC,Pp,-,-,-,-,-)                                                |
| H6  | U | 11014.2.2.6  | 8.461 | 7.89  | -0.571 | (Pp,GC,UA,CG,pP,-,-,kissing,kissing,kissing,-)                            |
| H6  | U | 17106.1.1.11 | 8.418 | 7.88  | -0.538 | (p-,C-,UA,AU,Pp,-,-,-,-,-)                                                |
| H6  | U | 17106.1.1.24 | 8.208 | 7.786 | -0.422 | (pP,CG,UA,A-,p,-,-,-,-,-)                                                 |
| H6  | U | 17106.1.1.26 | 6.818 | 7.509 | 0.691  | (pP,A-,U-,A-,P,-,-,-,-,-)                                                 |
| H6  | U | 17106.1.1.34 | 8.418 | 7.869 | -0.549 | (P-,CG,UA,AU,P,-,-,-,-,-)                                                 |
| H6  | U | 17316.1.1.47 | 6.932 | 7.378 | 0.446  | (pP,AU,U-,G-,P,-,-,-,-,-)                                                 |
| H6  | U | 17504.1.1.3  | 7.35  | 7.736 | 0.386  | (Pp,CG,UA,GC,pP,-,-,-,-,protein)                                          |
| H6  | U | 18892.1.1.7  | 7.236 | 7.694 | 0.458  | (Pp,A-,UA,CG,pP,-,-,-,-,-)                                                |
| H6  | U | 19039.1.1.33 | 7.282 | 7.679 | 0.397  | (Pp,A-,U-,CG,pP,-,-,-,-,-)                                                |
| H6  | U | 19260.1.1.43 | 8.063 | 7.68  | -0.383 | (Pp,AU,UA,CG,Pp,multiplet,multiplet,-,-,-,-)                              |
| H6  | U | 19290.1.1.8  | 7.133 | 7.56  | 0.427  | (P-,A-,U-,G-,P,-,-,-,-,-,protein)                                         |
| H6  | U | 19698.1.1.11 | 7.231 | 7.654 | 0.423  | (p-,U-,U-,A-,P,-,-,-,-,-)                                                 |
| H1' | A | 0006.1.1.18  | 4.599 | 5.114 | 0.515  | (P-,A-,AU,GC,Pp,gnra3,gnra4,gnra5,-,-,-)                                  |
| H1' | A | 5007.1.1.8   | 5.203 | 5.79  | 0.587  | (P-,A-,A-,GC,Pp,-,-,-,-,-)                                                |
| H1' | A | 5278.1.1.22  | 6.698 | 5.904 | -0.794 | (Pp,G-,A-,A-,P-,pseudoknot,pseudoknot,pseudoknot,pseudoknot,pseudoknot,-) |
| H1' | A | 6485.1.1.17  | 5.025 | 5.556 | 0.531  | (P-,A-,AU,UA,Pp,penta,penta,-,-,-,-)                                      |
| H1' | A | 6652.1.1.38  | 3.725 | 5.801 | 2.076  | (p-,A-,A-,G-,pP,multiplet,tetra2,tetra3,tetra4,tetra5,-)                  |
| H1' | A | 6756.1.1.16  | 4.534 | 5.046 | 0.512  | (P-,A-,AU,CG,pP,gnra3,gnra4,gnra5,-,-,-)                                  |
| H1' | A | 7230.1.1.6   | 5.033 | 5.775 | 0.742  | (P-,A-,A-,GC,pP,-,-,-,-,-)                                                |
| H1' | A | 7230.1.1.6   | 5.033 | 5.775 | 0.742  | (P-,A-,A-,GC,pP,-,-,-,-,-)                                                |
| H1' | A | 7405.1.1.8   | 5.318 | 5.84  | 0.522  | (Pp,G-,A-,G-,p,-,-,-,-,-)                                                 |
| H1' | A | 10018.1.1.22 | 4.993 | 5.808 | 0.815  | (p-,A-,A-,AU,Pp,-,-,-,-,-)                                                |
| H1' | A | 17504.1.1.33 | 6.535 | 5.998 | -0.537 | (Pp,CG,AU,GC,pP,-,-,-,-,-,protein)                                        |
| H1' | A | 18892.1.1.15 | 5.165 | 5.841 | 0.676  | (P-,U-,AU,GC,Pp,-,-,-,-,-)                                                |
| H1' | A | 19018.1.1.9  | 5.084 | 5.918 | 0.834  | (P-,CG,AU,CG,pP,-,-,-,-,-)                                                |
| H1' | A | 19534.1.1.12 | 4.895 | 6.023 | 1.128  | (P-,U-,A-,GC,Pp,-,-,-,-,-,protein)                                        |
| H1' | A | 19544.1.1.13 | 6.546 | 5.935 | -0.611 | (P-,G-,A-,U-,P,-,-,-,-,-)                                                 |
| H1' | A | 19544.1.1.15 | 4.849 | 5.874 | 1.025  | (P-,U-,A-,GC,Pp,-,-,-,-,-)                                                |
| H1' | A | 19546.1.1.9  | 6.357 | 5.79  | -0.567 | (pP,CG,A-,A-,P,-,-,-,-,-)                                                 |
| H1' | A | 19547.1.1.12 | 6.472 | 5.889 | -0.583 | (P-,G-,A-,A-,Pp,-,-,-,-,-)                                                |
| H1' | A | 19698.1.1.51 | 6.703 | 5.895 | -0.808 | (pP,C-,A-,AU,Pp,-,-,-,-,-)                                                |
| H1' | A | 19698.1.1.52 | 7.049 | 5.776 | -1.273 | (p-,A-,AU,AU,Pp,-,-,-,-,-)                                                |
| H1' | G | 4345.1.1.9   | 6.75  | 5.841 | -0.909 | (P-,A-,GC,UG,Pp,-,-,-,-,-,protein)                                        |
| H1' | G | 4345.1.1.24  | 4.6   | 5.426 | 0.826  | (pP,A-,G-,A-,P,-,-,-,-,-,protein)                                         |
| H1' | G | 4346.1.1.24  | 4.858 | 5.426 | 0.568  | (pP,A-,G-,A-,P,-,-,-,-,-,protein)                                         |

|     |   |              |       |       |        |                                                                            |
|-----|---|--------------|-------|-------|--------|----------------------------------------------------------------------------|
| H1' | G | 4750.1.1.8   | 4.795 | 5.69  | 0.895  | (p-,A-,G-,GA,pP,-,-,-,-,-)                                                 |
| H1' | G | 4750.1.1.21  | 4.725 | 5.391 | 0.666  | (Pp,AG,G-,C-,P,-,-,-,-,-)                                                  |
| H1' | G | 4750.1.1.24  | 4.635 | 5.547 | 0.912  | (p-,A-,GC,CG,Pp,-,-,-,-,-)                                                 |
| H1' | G | 4780.1.1.4   | 7.598 | 5.891 | -1.707 | (Pp,CG,GC,AA,pP,-,-,-, multiplet,-,-)                                      |
| H1' | G | 4781.2.2.4   | 7.596 | 5.849 | -1.747 | (Pp,CG,GC,AU,pP,-,-, multiplet,-,-,-)                                      |
| H1' | G | 4867.2.2.19  | 3.933 | 5.471 | 1.538  | (pP,AG,GC,GC,pP, multiplet,-,-,-,-,-)                                      |
| H1' | G | 5007.1.1.26  | 4.153 | 5.467 | 1.314  | (P-,A-,GC,CG,Pp,-,-,-,-,-)                                                 |
| H1' | G | 5193.1.1.8   | 4.702 | 5.624 | 0.922  | (P-,U-,G-,G-,pP,-,-,-,-,-)                                                 |
| H1' | G | 5278.1.1.21  | 6.498 | 5.932 | -0.566 | (Pp,AU,G-,A-,P-, pseudoknot,pseudoknot,pseudoknot,pseudoknot,pseudoknot,-) |
| H1' | G | 5614.1.1.6   | 4.457 | 5.465 | 1.008  | (P-,A-,GC,CG,pP,-,-,-,-,-)                                                 |
| H1' | G | 5852.1.1.8   | 4.82  | 5.53  | 0.71   | (P-,A-,GC,AU,pP,-,-,-,-,-)                                                 |
| H1' | G | 5852.1.1.20  | 4.123 | 5.465 | 1.342  | (P-,A-,GC,CG,pP,-,-,-,-,-)                                                 |
| H1' | G | 5919.1.1.39  | 4.363 | 5.724 | 1.361  | (p-,A-,G-,CG,pP,-,-,-,-,-)                                                 |
| H1' | G | 5932.1.1.11  | 5.014 | 5.725 | 0.711  | (P-,U-,GC,AU,Pp,-,-,-,-,-)                                                 |
| H1' | G | 6652.1.1.39  | 4.967 | 5.735 | 0.768  | (P-,A-,G-,UA,pP,tetra2,tetra3,tetra4,tetra5,-,-)                           |
| H1' | G | 11489.1.1.11 | 5.425 | 5.993 | 0.568  | (P-,G-,G-,A-,-, multiplet,multiplet,multiplet,-,-,protein)                 |
| H1' | G | 15113.1.1.33 | 6.495 | 5.838 | -0.657 | (Pp,CG,GC,GC,Pp,-,-,-,-,3prime-nc)                                         |
| H1' | G | 17106.1.1.6  | 4.623 | 5.576 | 0.953  | (Pp,AU,GC,GC,p,-,-,-,-,-)                                                  |
| H1' | G | 17316.1.1.24 | 4.242 | 5.607 | 1.365  | (p-,A-,GC,GC,Pp,-,-,-,-,-)                                                 |
| H1' | G | 18036.1.1.2  | 5.234 | 5.892 | 0.658  | (-,GC,GC,AU,pP,-,-,-,-,-)                                                  |
| H1' | G | 19018.1.1.16 | 5.927 | 4.595 | -1.332 | (p-,G-,GC,GC,pP,uncg3,uncg4,uncg5,-,-,-)                                   |
| H1' | G | 19018.1.1.17 | 4.454 | 5.555 | 1.101  | (P-,GC,GC,UA,Pp,uncg4,uncg5,-,-,-,-)                                       |
| H1' | G | 19547.1.1.14 | 4.895 | 5.467 | 0.572  | (P-,A-,GC,CG,Pp,-,-,-,-,-)                                                 |
| H1' | C | 4867.2.2.10  | 5.203 | 5.746 | 0.543  | (P-,U-,C-,C-,p,-,-,-,-,-,protein)                                          |
| H1' | C | 5278.1.1.7   | 3.598 | 5.531 | 1.933  | (pP,CG,CG,GC,Pp,pseudoknot,pseudoknot,pseudoknot,pseudoknot,pseudoknot,-)  |
| H1' | C | 6076.1.1.23  | 3.919 | 4.61  | 0.691  | (P-,A-,CG,CG,Pp,gnra3,gnra4,gnra5,-,-,-)                                   |
| H1' | C | 6077.1.1.23  | 3.935 | 4.61  | 0.675  | (P-,A-,CG,CG,Pp,gnra3,gnra4,gnra5,-,-,-)                                   |
| H1' | C | 6477.1.1.4   | 3.724 | 5.44  | 1.716  | (Pp,GC,CG,UA,Pp,-,-, multiplet,multiplet,multiplet,-)                      |
| H1' | C | 6477.1.1.28  | 6.297 | 5.576 | -0.721 | (Pp,CG,CG,CG,p-, multiplet,-,-,-,-,-)                                      |
| H1' | C | 6477.1.1.29  | 6.119 | 5.466 | -0.653 | (pP,CG,CG,C-,P,-,-,-,-,-)                                                  |
| H1' | C | 6652.1.1.24  | 3.308 | 5.052 | 1.744  | (P-,A-,CG,UG,pP,gnra3, multiplet,-,-,-,-)                                  |
| H1' | C | 15113.1.1.42 | 6.271 | 5.343 | -0.928 | (P-,A-,CG,CG,pP,tetra3,tetra4,tetra5,-,-,-)                                |
| H1' | C | 17406.1.1.8  | 3.937 | 5.223 | 1.286  | (P-,A-,CG,AU,pP,tetra3,tetra4,tetra5,-,-,-)                                |
| H1' | C | 17406.1.1.8  | 3.937 | 5.223 | 1.286  | (P-,A-,CG,AU,pP,tetra3,tetra4,tetra5,-,-,-)                                |
| H1' | C | 19018.1.1.8  | 5.944 | 5.327 | -0.617 | (pP,A-,CG,AU,pP,-,-,-,-,-)                                                 |
| H1' | C | 19698.1.1.21 | 3.442 | 5.517 | 2.075  | (pP,U-,CG,AU,pP,-,-,-,-,-)                                                 |
| H1' | C | 19698.1.1.46 | 5.823 | 5.313 | -0.51  | (P-,A-,CG,CG,Pp,tetra3,tetra4,tetra5,-,-,-)                                |
| H1' | U | 5371.1.1.19  | 5.288 | 5.744 | 0.456  | (Pp,A-,U-,GC,Pp,-,-,-,-,-)                                                 |
| H1' | U | 5919.1.1.10  | 5.153 | 5.769 | 0.616  | (P-,A-,U-,A-,pP,-,-,-,-,-)                                                 |

|     |   |              |       |       |        |                                                                                 |
|-----|---|--------------|-------|-------|--------|---------------------------------------------------------------------------------|
| H1' | U | 6005.1.1.4   | 5.126 | 5.785 | 0.659  | (p-,A-,U-,U-,p-,,-,-,-,-,protein)                                               |
| H1' | U | 6320.1.1.23  | 5.27  | 5.744 | 0.474  | (Pp,A-,U-,GC,Pp,-,-,-,-,-,-)                                                    |
| H1' | U | 6509.1.1.5   | 5.048 | 5.493 | 0.445  | (Pp,GC,UA,GC,Pp-,<br>,pseudoknot,pseudoknot,pseudoknot,pseudoknot,-)            |
| H1' | U | 15745.1.1.14 | 6.076 | 5.607 | -0.469 | (P-,GC,U-,CG,pP,-,-,-,-,-,-)                                                    |
| H1' | U | 17106.1.1.22 | 4.723 | 5.525 | 0.802  | (pP,CG,UA,CG,pP,-,-,-,-,-,-)                                                    |
| H1' | U | 17106.1.1.24 | 6.423 | 5.628 | -0.795 | (pP,CG,UA,A-,p-,,-,-,-,-,-)                                                     |
| H1' | U | 17106.1.1.26 | 4.943 | 5.52  | 0.577  | (pP,A-,U-,A-,P-,,-,-,-,-,-)                                                     |
| H1' | U | 17316.1.1.12 | 4.662 | 5.609 | 0.947  | (P-,A-,U-,UA,Pp,-,-,-,-,-,-)                                                    |
| H1' | U | 17316.1.1.22 | 5.452 | 5.912 | 0.46   | (P-,G-,U-,A-,Pp,-,-,-,-,-,-)                                                    |
| H1' | U | 17877.1.1.19 | 3.829 | 5.057 | 1.228  | (P-,A-,UA,GU,pP,gnra3,gnra4,gnra5,-,-,-)                                        |
| H1' | U | 17972.1.1.16 | 3.876 | 5.11  | 1.234  | (P-,A-,UA,GC,Pp,gnra3,gnra4,gnra5,-,-,-)                                        |
| H1' | U | 18035.1.1.20 | 5.098 | 5.578 | 0.48   | (Pp,GC,UA,CG,pP,-,-,-,-,-,-)                                                    |
| H1' | U | 18532.1.1.22 | 5.129 | 5.661 | 0.532  | (p-,A-,U-,CG,P-,,-,-,-,multiplet,multiplet,-)                                   |
| H1' | U | 18656.1.1.7  | 6.368 | 5.925 | -0.443 | (P-,G-,U-,GC,pP,-,-,-,-,-,-)                                                    |
| H1' | U | 19018.1.1.13 | 5.57  | 6.106 | 0.536  | (pP,U-,U-,C-,P-,,-,uncg1,uncg2,uncg3,uncg4,-)                                   |
| H1' | U | 19260.1.1.35 | 6.156 | 5.71  | -0.446 | (p-,GC,U-,GC,p-,multiplet,-,-,multiplet,-,-)                                    |
| H1' | U | 19698.1.1.20 | 4.955 | 5.658 | 0.703  | (pP,UA,U-,CG,Pp,-,-,-,-,-,-)                                                    |
| H1' | U | 19726.1.1.8  | 4.843 | 5.752 | 0.909  | (p-,A-,U-,A-,p-,,-,-,-,-,protein)                                               |
| H2' | A | 4345.1.1.23  | 4     | 4.674 | 0.674  | (Pp,CG,A-,G-,P-,,-,-,-,-,protein)                                               |
| H2' | A | 4346.1.1.8   | 4.118 | 4.881 | 0.763  | (Pp,G-,A-,GC,pP,-,-,-,-,-,protein)                                              |
| H2' | A | 5278.1.1.23  | 5.278 | 4.783 | -0.495 | (P-,A-,A-,A-,p-,<br>,pseudoknot,pseudoknot,pseudoknot,pseudoknot,pseudoknot,-)  |
| H2' | A | 6509.1.1.23  | 3.577 | 4.59  | 1.013  | (P-,A-,AU,A-,p-,pseudoknot,pseudoknot,-,pseudoknot,-,-)                         |
| H2' | A | 7404.1.1.11  | 4.086 | 4.547 | 0.461  | (p-,U-,A-,C-,p-,,-,-,-,-,-)                                                     |
| H2' | A | 11489.1.1.6  | 5.897 | 4.883 | -1.014 | (P-,G-,A-,G-,P-,<br>,multiplet,multiplet,multiplet,multiplet,multiplet,-)       |
| H2' | A | 11489.1.1.9  | 4.344 | 4.926 | 0.582  | (P-,G-,A-,G-,P-,<br>,multiplet,multiplet,multiplet,multiplet,multiplet,protein) |
| H2' | A | 16920.1.1.4  | 5.892 | 4.834 | -1.058 | (P-,G-,A-,A-,p-,,-,-,-,-,protein)                                               |
| H2' | A | 17106.1.1.30 | 3.763 | 4.556 | 0.793  | (P-,A-,A-,A-,P-,,-,-,-,-,-)                                                     |
| H2' | A | 17316.1.1.50 | 4.042 | 4.501 | 0.459  | (P-,A-,AU,CG,pP,-,-,-,-,-,-)                                                    |
| H2' | A | 17504.1.1.33 | 5.931 | 4.81  | -1.121 | (Pp,CG,AU,GC,pP,-,-,-,-,-,protein)                                              |
| H2' | A | 18336.1.1.22 | 4.036 | 4.548 | 0.512  | (Pp,A-,A-,AU,Pp,-,-,-,-,-,-)                                                    |
| H2' | A | 18549.1.1.16 | 3.893 | 4.521 | 0.628  | (P-,A-,A-,AU,pP,-,-,-,-,-,-)                                                    |
| H2' | A | 19040.1.1.48 | 5.401 | 4.516 | -0.885 | (pP,CG,A-,G-,P-,,-,-,-,-,-)                                                     |
| H2' | A | 19698.1.1.52 | 5.298 | 4.646 | -0.652 | (p-,A-,AU,AU,Pp,-,-,-,-,-,-)                                                    |
| H2' | G | 0001.1.1.20  | 4.056 | 4.59  | 0.534  | (pP,G-,G-,A-,P-,,-,tetra1,tetra2,tetra3,tetra4,-)                               |
| H2' | G | 4120.1.1.32  | 4.037 | 4.487 | 0.45   | (Pp,GC,GC,U-,p-,,-,-,-,-,-)                                                     |
| H2' | G | 4345.1.1.6   | 3.4   | 4.447 | 1.047  | (pP,CG,GU,G-,P-,,-,-,-,-,protein)                                               |
| H2' | G | 4750.1.1.21  | 3.905 | 4.37  | 0.465  | (Pp,AG,G-,C-,P-,,-,-,-,-,-)                                                     |
| H2' | G | 4781.2.2.8   | 3.906 | 4.363 | 0.457  | (pP,UA,G-,G-,p-,,-,-,-,-,protein)                                               |



|     |   |              |       |       |        |                                                                           |
|-----|---|--------------|-------|-------|--------|---------------------------------------------------------------------------|
| H2' | G | 4867.2.2.13  | 5.643 | 4.932 | -0.711 | (p-,C-,G-,A-,PP,-,-,-,-,-,protein)                                        |
| H2' | G | 5007.1.1.16  | 4.163 | 4.637 | 0.474  | (p-,C-,G-,U-,p,-,-,-,-,-,-)                                               |
| H2' | G | 5170.1.1.14  | 3.991 | 4.503 | 0.512  | (Pp,GC,GC,CG,pP,-,-,-,-,-,-)                                              |
| H2' | G | 5632.1.1.15  | 3.9   | 4.608 | 0.708  | (p-,C-,G-,C-,p,-,-,-,-,-,-)                                               |
| H2' | G | 5919.1.1.39  | 4.273 | 4.771 | 0.498  | (p-,A-,G-,CG,pP,-,-,-,-,-,-)                                              |
| H2' | G | 11489.1.1.4  | 5.536 | 4.816 | -0.72  | (P-,A-,G-,G-,P-,<br>,multiplet,multiplet,multiplet,multiplet,multiplet,-) |
| H2' | G | 16920.1.1.3  | 4.318 | 4.826 | 0.508  | (P-,A-,G-,A-,P,-,-,-,-,-,protein)                                         |
| H2' | G | 17106.1.1.7  | 3.913 | 4.487 | 0.574  | (Pp,GC,GC,U-,p,-,-,-,-,-,-)                                               |
| H2' | G | 17406.1.1.5  | 3.617 | 4.2   | 0.583  | (Pp,A-,G-,G-,P-,,-,tetra1,tetra2,tetra3,tetra4,-)                         |
| H2' | G | 17406.1.1.5  | 3.617 | 4.2   | 0.583  | (Pp,A-,G-,G-,P-,,-,tetra1,tetra2,tetra3,tetra4,-)                         |
| H2' | G | 17449.1.1.1  | 4.249 | 4.73  | 0.481  | (-,GC,CG,Pp,-,-,-,-,-,-)                                                  |
| H2' | G | 17504.1.1.6  | 5.35  | 4.736 | -0.614 | (Pp,CG,G-,GC,pP,-,-,multiplet,-,-,-)                                      |
| H2' | G | 17504.1.1.7  | 6.449 | 4.777 | -1.672 | (pP,G-,GC,UG,P-,,-,multiplet,-,-,multiplet,protein)                       |
| H2' | G | 17504.1.1.15 | 4.278 | 4.828 | 0.55   | (P-,A-,G-,G-,P,-,-,-,multiplet,multiplet,multiplet,-)                     |
| H2' | G | 17504.1.1.21 | 4.94  | 4.486 | -0.454 | (p-,G-,G-,C-,p,-,-,multiplet,multiplet,-,-,-)                             |
| H2' | G | 17504.1.1.29 | 5.336 | 4.751 | -0.585 | (p-,U-,GU,CG,Pp,-,-,-,-,-,-)                                              |
| H2' | G | 17504.1.1.36 | 5.249 | 4.404 | -0.845 | (Pp,CG,G-,,-,-,-,-,-,protein)                                             |
| H2' | G | 18035.1.1.1  | 4.471 | 4.924 | 0.453  | (-,GC,GC,Pp,-,-,-,-,-,-)                                                  |
| H2' | G | 18035.1.1.7  | 4.073 | 4.528 | 0.455  | (pP,CG,GU,GC,pP,-,-,-,-,-,-)                                              |
| H2' | G | 18036.1.1.7  | 4.063 | 4.528 | 0.465  | (pP,CG,GU,GC,pP,-,-,-,-,-,-)                                              |
| H2' | G | 18549.1.1.1  | 4.023 | 4.924 | 0.901  | (-,GC,GC,Pp,-,-,-,-,-,-)                                                  |
| H2' | G | 18656.1.1.4  | 5.061 | 4.452 | -0.609 | (Pp,CG,G-,A-,P,-,-,-,-,-,-)                                               |
| H2' | G | 18656.1.1.6  | 6.279 | 4.864 | -1.415 | (P-,A-,G-,U-,Pp,-,-,-,-,-,-)                                              |
| H2' | G | 19018.1.1.1  | 3.88  | 4.936 | 1.056  | (-,GC,GC,pP,-,-,-,-,-,-)                                                  |
| H2' | G | 19290.1.1.9  | 5.684 | 4.889 | -0.795 | (P-,U-,G-,A-,P,-,-,-,-,-,protein)                                         |
| H2' | G | 19544.1.1.8  | 4.956 | 4.49  | -0.466 | (pP,CG,G-,A-,p,-,-,-,-,-,-)                                               |
| H2' | G | 19698.1.1.8  | 4.009 | 4.462 | 0.453  | (Pp,UA,GC,C-,p,-,-,-,-,-,-)                                               |
| H2' | C | 4120.1.1.18  | 4.927 | 4.373 | -0.554 | (pP,CG,CG,CG,pP,-,-,-,-,-,5prime-nc)                                      |
| H2' | C | 4120.1.1.20  | 4.107 | 4.529 | 0.422  | (pP,CG,CG,C-,p,-,-,-,-,tetra1,tetra2,-)                                   |
| H2' | C | 4750.1.1.6   | 4.025 | 4.388 | 0.363  | (Pp,UA,C-,A-,P,-,-,-,-,-,-)                                               |
| H2' | C | 4867.2.2.11  | 3.853 | 4.298 | 0.445  | (p-,C-,C-,C-,P,-,-,-,-,-,protein)                                         |
| H2' | C | 5007.1.1.20  | 4.013 | 4.419 | 0.406  | (p-,GC,CG,CG,pP,-,-,-,-,-,-)                                              |
| H2' | C | 5007.1.1.30  | 4.433 | 4.007 | -0.426 | (Pp,CG,CG,-,-,-,-,-,-,-)                                                  |
| H2' | C | 5023.1.1.5   | 4.727 | 4.367 | -0.36  | (pP,GC,CG,U-,p,-,-,-,-,-,-)                                               |
| H2' | C | 5278.1.1.7   | 4.268 | 4.641 | 0.373  | (pP,CG,CG,GC,Pp,pseudoknot,pseudoknot,pseudoknot,pseudoknot,pseudoknot,-) |
| H2' | C | 5278.1.1.14  | 3.668 | 4.278 | 0.61   | (Pp,AU,CG,U-,pP,-,-,pseudoknot,-,pseudoknot,-)                            |
| H2' | C | 5632.1.1.30  | 4.623 | 4.049 | -0.574 | (pP,CG,C-,,-,-,-,-,-,-)                                                   |
| H2' | C | 6115.1.1.33  | 4.6   | 4.198 | -0.402 | (Pp,GU,CG,CG,-,-,-,-,-,-,-)                                               |
| H2' | C | 6477.1.1.46  | 3.99  | 4.38  | 0.39   | (Pp,GC,CG,A-,,-,-,-,-,-,-)                                                |
| H2' | C | 6509.1.1.15  | 5.03  | 4.664 | -0.366 | (P-,CG,CG,AU,pP,-                                                         |

|     |   |              |       |       |        |                                                         |
|-----|---|--------------|-------|-------|--------|---------------------------------------------------------|
|     |   |              |       |       |        | ,pseudoknot,pseudoknot,pseudoknot,pseudoknot,-)         |
| H2' | C | 6562.1.1.18  | 4.644 | 4.062 | -0.582 | (Pp,UG,CG,-,-,-,-,-,-,-)                                |
| H2' | C | 15417.1.1.21 | 3.893 | 4.414 | 0.521  | (p-,GC,CG,A-,P-,,-,-,-,-,-)                             |
| H2' | C | 15745.1.1.22 | 4.666 | 4.062 | -0.604 | (Pp,UG,CG,-,-,-,-,-,-,-)                                |
| H2' | C | 15858.2.2.7  | 4.522 | 4.062 | -0.46  | (Pp,UG,CG,-,-,-,-,-,-,-)                                |
| H2' | C | 16431.1.1.28 | 4.682 | 4.062 | -0.62  | (Pp,UG,CG,-,-,-,-,-,-,-)                                |
| H2' | C | 16655.1.1.7  | 4.683 | 4.308 | -0.375 | (Pp,C-,C-,C-,P-,,-,-,-,-,-)                             |
| H2' | C | 17316.1.1.41 | 3.912 | 4.318 | 0.406  | (p-,A-,C-,A-,pP,-,-,-,-,-,-)                            |
| H2' | C | 17504.1.1.5  | 3.763 | 4.322 | 0.559  | (pP,GC,CG,G-,Pp,-,-,-,multiplet,-,protein)              |
| H2' | C | 17682.1.1.31 | 4.545 | 3.993 | -0.552 | (pP,CG,CG,-,-,-,-,-,-,-)                                |
| H2' | C | 17941.1.1.27 | 4.663 | 4.062 | -0.601 | (Pp,UG,CG,-,-,-,-,-,-,-)                                |
| H2' | C | 18036.1.1.5  | 3.941 | 4.387 | 0.446  | (Pp,CG,CG,CG,Pp,-,-,-,-,-,-)                            |
| H2' | C | 18036.1.1.6  | 4.061 | 4.499 | 0.438  | (pP,CG,CG,GU,Pp,-,-,-,-,-,-)                            |
| H2' | C | 18336.1.1.26 | 3.907 | 4.256 | 0.349  | (Pp,UA,CG,CG,-,-,-,-,-,-,-)                             |
| H2' | C | 19382.1.1.3  | 4.933 | 4.527 | -0.406 | (P-,U-,C-,A-,P-,,-,-,-,-,-,protein)                     |
| H2' | C | 19548.1.1.8  | 4.86  | 4.468 | -0.392 | (Pp,UA,CG,A-,P-,,-,-,-,-,-)                             |
| H2' | C | 19698.1.1.21 | 3.778 | 4.451 | 0.673  | (pP,U-,CG,AU,pP,-,-,-,-,-,-)                            |
| H2' | U | 4120.1.1.22  | 5.047 | 4.38  | -0.667 | (pP,C-,U-,U-,p,-,tetra1,tetra2,tetra3,tetra4,-)         |
| H2' | U | 6115.1.1.6   | 4.63  | 4.126 | -0.504 | (pP,AU,UG,CG,Pp,-,-,-,-,-,-)                            |
| H2' | U | 7090.1.1.11  | 4.848 | 4.3   | -0.548 | (P-,A-,U-,G-,Pp,-,-,-,-,-,-)                            |
| H2' | U | 7404.1.1.10  | 4.695 | 4.302 | -0.393 | (pP,U-,U-,A-,p,-,-,-,-,-,-)                             |
| H2' | U | 15113.1.1.39 | 3.443 | 4.057 | 0.614  | (Pp,A-,U-,G-,P-,,-,tetra1,tetra2,tetra3,tetra4,protein) |
| H2' | U | 16941.1.1.7  | 4.76  | 4.269 | -0.491 | (Pp,AU,U-,C-,p,-,-,-,-,-,-,protein)                     |
| H2' | U | 17106.1.1.26 | 2.663 | 4.198 | 1.535  | (pP,A-,U-,A-,P-,,-,-,-,-,-)                             |
| H2' | U | 17309.1.1.8  | 3.973 | 4.395 | 0.422  | (pP,U-,U-,GC,p,-,-,-,-,-,-)                             |
| H2' | U | 17316.1.1.47 | 3.762 | 4.184 | 0.422  | (pP,AU,U-,G-,P-,,-,-,-,-,-)                             |
| H2' | U | 18035.1.1.20 | 4.069 | 4.514 | 0.445  | (Pp,GC,UA,CG,pP,-,-,-,-,-,-)                            |
| H2' | U | 19549.1.1.9  | 4.57  | 4.154 | -0.416 | (p-,A-,U-,,-,-,-,-,-,-,-)                               |
| H2' | U | 19662.1.1.13 | 4.766 | 4.357 | -0.409 | (Pp,CG,U-,A-,pP,-,-,-,-,-,-)                            |
| H2' | U | 19662.1.1.13 | 4.766 | 4.357 | -0.409 | (Pp,CG,U-,A-,pP,-,-,-,-,-,-)                            |
| H2' | U | 19698.1.1.10 | 4.701 | 4.274 | -0.427 | (Pp,C-,U-,U-,P-,,-,-,-,-,-)                             |
| H2' | U | 19726.1.1.5  | 3.834 | 4.274 | 0.44   | (P-,C-,U-,C-,P-,,-,-,-,-,-,protein)                     |
| H3' | A | 0001.1.1.21  | 4.332 | 4.741 | 0.409  | (P-,G-,A-,G-,Pp,tetra1,tetra2,tetra3,tetra4,tetra5,-)   |
| H3' | A | 4125.1.1.5   | 4.145 | 4.576 | 0.431  | (pP,CG,AA,AU,P-,,-,-,-,-,-)                             |
| H3' | A | 5919.1.1.6   | 4.143 | 4.566 | 0.423  | (p-,G-,A-,C-,P-,,-,-,-,-,-)                             |
| H3' | A | 6115.1.1.20  | 4.24  | 4.654 | 0.414  | (p-,G-,A-,A-,P-,,-,-,-,-,-)                             |
| H3' | A | 15257.1.1.8  | 5     | 4.615 | -0.385 | (pP,CG,A-,C-,P-,,-,-,-,-,-)                             |
| H3' | A | 16920.1.1.4  | 5.349 | 4.727 | -0.622 | (P-,G-,A-,A-,p,-,-,-,-,-,-,protein)                     |
| H3' | A | 17316.1.1.46 | 4.272 | 4.679 | 0.407  | (pP,CG,AU,U-,P-,,-,-,-,-,-)                             |
| H3' | A | 17682.1.1.17 | 4.489 | 5.248 | 0.759  | (p-,A-,A-,GC,Pp,gnra2,gnra3,gnra4,gnra5,-,-)            |
| H3' | A | 18549.1.1.16 | 4.103 | 4.559 | 0.456  | (P-,A-,A-,AU,pP,-,-,-,-,-,-)                            |

|     |   |              |       |       |        |                                                                      |
|-----|---|--------------|-------|-------|--------|----------------------------------------------------------------------|
| H3' | A | 19018.1.1.20 | 4.126 | 4.612 | 0.486  | (pP,GC,A-,A-,Pp,-,-,-,-,-)                                           |
| H3' | A | 19040.1.1.48 | 5.171 | 4.695 | -0.476 | (pP,CG,A-,G-,P,-,-,-,-,-)                                            |
| H3' | A | 19544.1.1.9  | 5.106 | 4.642 | -0.464 | (pP,G-,A-,C-,P,-,-,-,-,-)                                            |
| H3' | A | 19544.1.1.13 | 5.184 | 4.714 | -0.47  | (P-,G-,A-,U-,P,-,-,-,-,-)                                            |
| H3' | A | 19546.1.1.9  | 5.048 | 4.62  | -0.428 | (pP,CG,A-,A-,P,-,-,-,-,-)                                            |
| H3' | A | 19546.1.1.13 | 5.145 | 4.737 | -0.408 | (P-,G-,A-,C-,Pp,-,-,-,-,-)                                           |
| H3' | A | 19549.1.1.8  | 4.143 | 4.62  | 0.477  | (P-,C-,A-,U,-,-,-,-,-)                                               |
| H3' | A | 19698.1.1.52 | 5.099 | 4.622 | -0.477 | (p-,A-,AU,AU,Pp,-,-,-,-,-)                                           |
| H3' | A | 19726.1.1.3  | 4.064 | 4.563 | 0.499  | (p-,U-,A-,C-,p,-,-,-,-,-,protein)                                    |
| H3' | G | 4120.1.1.1   | 4.117 | 4.684 | 0.567  | (-,GC,GC,Pp,-,-,-,-,-)                                               |
| H3' | G | 4120.1.1.3   | 4.087 | 4.488 | 0.401  | (Pp,GC,GC,AU,Pp,-,-,-,-,-)                                           |
| H3' | G | 4120.1.1.30  | 3.987 | 4.416 | 0.429  | (Pp,AU,GC,GC,Pp,-,-,-,-,-,5prime-nc)                                 |
| H3' | G | 4125.1.1.23  | 4.095 | 4.491 | 0.396  | (pP,CG,G-,G-,P,-,-,-,-,-)                                            |
| H3' | G | 4250.1.1.2   | 4.194 | 4.583 | 0.389  | (-,GC,GC,UA,pP,-,-,-,-,-)                                            |
| H3' | G | 4816.1.1.23  | 4.076 | 4.479 | 0.403  | (pP,U-,GC,C-,pP,-,-,-,-,-)                                           |
| H3' | G | 4867.2.2.2   | 4.983 | 4.577 | -0.406 | (-,GC,GC,CG,pP,-,-,-,-,-)                                            |
| H3' | G | 5007.1.1.10  | 4.003 | 4.484 | 0.481  | (P-,GC,GC,GC,pP,-,-,-,-,-)                                           |
| H3' | G | 5632.1.1.15  | 4.121 | 4.601 | 0.48   | (p-,C-,G-,C-,p,-,-,-,-,-)                                            |
| H3' | G | 5703.1.1.2   | 5.535 | 4.583 | -0.952 | (-,GC,GC,UA,pP,-,-,-,-,-)                                            |
| H3' | G | 5962.1.1.13  | 4.103 | 4.548 | 0.445  | (Pp,CG,GC,AU,pP,-,-,-,-,-)                                           |
| H3' | G | 6115.1.1.19  | 4.31  | 4.713 | 0.403  | (P-,C-,G-,A-,P,-,-,-,-,-)                                            |
| H3' | G | 7230.1.1.4   | 5.005 | 4.606 | -0.399 | (pP,CG,G-,A-,P,-,-,-,-,-)                                            |
| H3' | G | 7230.1.1.4   | 5.005 | 4.606 | -0.399 | (pP,CG,G-,A-,P,-,-,-,-,-)                                            |
| H3' | G | 11489.1.1.1  | 4.962 | 4.511 | -0.451 | (-,G-,G-,P,-,-,-,-,multiplet,multiplet,multiplet,-)                  |
| H3' | G | 11489.1.1.7  | 5.083 | 4.609 | -0.474 | (P-,A-,G-,G-,P-,multiplet,multiplet,multiplet,multiplet,multiplet,-) |
| H3' | G | 15113.1.1.40 | 4.247 | 4.836 | 0.589  | (P-,U-,G-,A-,pP,tetra1,tetra2,tetra3,tetra4,tetra5,protein)          |
| H3' | G | 15417.1.1.12 | 4.887 | 4.487 | -0.4   | (Pp,AU,G-,A-,P,-,-,-,-,-)                                            |
| H3' | G | 15745.1.1.13 | 5.026 | 4.524 | -0.502 | (P-,G-,GC,U-,pP,-,-,-,-,-)                                           |
| H3' | G | 15856.1.1.19 | 4.418 | 4.807 | 0.389  | (p-,U-,G-,A-,Pp,-,-,-,-,-)                                           |
| H3' | G | 17408.1.1.17 | 4.182 | 4.605 | 0.423  | (p-,G-,G-,G-,P,-,-,-,-,-)                                            |
| H3' | G | 17408.1.1.18 | 4.335 | 4.798 | 0.463  | (P-,G-,G-,A-,Pp,-,-,-,-,-)                                           |
| H3' | G | 17504.1.1.16 | 5.163 | 4.762 | -0.401 | (P-,G-,G-,A-,P,-,-,-,-,multiplet,multiplet,multiplet,multiplet,-)    |
| H3' | G | 17504.1.1.36 | 5.166 | 4.577 | -0.589 | (Pp,CG,G,-,-,-,-,-,protein)                                          |
| H3' | G | 18035.1.1.1  | 4.194 | 4.684 | 0.49   | (-,GC,GC,Pp,-,-,-,-,-)                                               |
| H3' | G | 18035.1.1.17 | 4.05  | 4.47  | 0.42   | (pP,UG,GC,GC,Pp,-,-,-,-,-)                                           |
| H3' | G | 18036.1.1.14 | 4.764 | 4.366 | -0.398 | (P-,C-,GC,CG,pP,tetra3,tetra4,tetra5,-,-,-)                          |
| H3' | G | 18549.1.1.1  | 4.253 | 4.684 | 0.431  | (-,GC,GC,Pp,-,-,-,-,-)                                               |
| H3' | G | 18894.1.1.19 | 4.418 | 4.807 | 0.389  | (p-,U-,G-,A-,Pp,-,-,-,-,-)                                           |
| H3' | G | 19018.1.1.1  | 4.088 | 4.711 | 0.623  | (-,GC,GC,pP,-,-,-,-,-)                                               |
| H3' | G | 19290.1.1.3  | 4.407 | 4.826 | 0.419  | (P-,U-,G-,U-,P,-,-,-,-,-,protein)                                    |

|     |   |              |         |         |        |                                                          |
|-----|---|--------------|---------|---------|--------|----------------------------------------------------------|
| H3' | C | 4745.1.1.5   | 4.084   | 4.498   | 0.414  | (Pp,GC,CG,AU,pP,-,-,-,-,-)                               |
| H3' | C | 4745.1.1.11  | 4.064   | 4.417   | 0.353  | (pP,GC,CG,CG,-,-,-,-,-)                                  |
| H3' | C | 4745.1.1.5   | 4.084   | 4.498   | 0.414  | (Pp,GC,CG,AU,pP,-,-,-,-,-)                               |
| H3' | C | 4745.1.1.11  | 4.064   | 4.417   | 0.353  | (pP,GC,CG,CG,-,-,-,-,-)                                  |
| H3' | C | 5023.1.1.5   | 4.957   | 4.357   | -0.6   | (pP,GC,CG,U-,p,-,-,-,-,-)                                |
| H3' | C | 5528.1.1.6   | 4.083   | 4.516   | 0.433  | (Pp,GU,CG,A-,Pp,-,-,-,-,-)                               |
| H3' | C | 6115.1.1.4   | 4.22    | 4.566   | 0.346  | (Pp,UG,CG,AU,pP,-,-,-,-,-)                               |
| H3' | C | 6477.1.1.4   | 3.733   | 4.391   | 0.658  | (Pp,GC,CG,UA,Pp,-,-,multiplet,multiplet,multiplet,-)     |
| H3' | C | 6477.1.1.30  | 4.107   | 4.509   | 0.402  | (pP,CG,C-,A-,P,-,-,-,-,-)                                |
| H3' | C | 6562.1.1.18  | 4.979   | 4.238   | -0.741 | (Pp,UG,CG,-,-,-,-,-)                                     |
| H3' | C | 15113.1.1.17 | 4.207   | 4.555   | 0.348  | (pP,U-,CG,GC,pP,-,-,-,-,-)                               |
| H3' | C | 15331.1.1.2  | 5.631   | 4.618   | -1.013 | (-,CG,CG,UA,pP,-,-,-,-,-)                                |
| H3' | C | 15745.1.1.22 | 4.996   | 4.238   | -0.758 | (Pp,UG,CG,-,-,-,-,-)                                     |
| H3' | C | 16431.1.1.28 | 5.022   | 4.238   | -0.784 | (Pp,UG,CG,-,-,-,-,-)                                     |
| H3' | C | 16877.1.1.23 | 3.96    | 4.362   | 0.402  | (pP,UA,CG,UA,pP,-,-,-,-,3prime-nc)                       |
| H3' | C | 16941.1.1.23 | 3.952   | 4.362   | 0.41   | (pP,UA,CG,UA,pP,-,-,-,-,3prime-nc)                       |
| H3' | C | 17572.1.1.6  | 4.022   | 4.391   | 0.369  | (Pp,AU,C-,U-,P,-,-,-,-,-)                                |
| H3' | C | 17941.1.1.27 | 5.012   | 4.238   | -0.774 | (Pp,UG,CG,-,-,-,-,-)                                     |
| H3' | C | 18336.1.1.26 | 4.127   | 4.478   | 0.351  | (Pp,UA,CG,CG,-,-,-,-,-)                                  |
| H3' | C | 19698.1.1.21 | 4.243   | 4.625   | 0.382  | (pP,U-,CG,AU,pP,-,-,-,-,-)                               |
| H3' | C | 19698.1.1.35 | 4.856   | 4.408   | -0.448 | (p-,A-,C-,A-,p,-,-,-,-,-)                                |
| H3' | C | 19726.1.1.4  | 4.878   | 4.463   | -0.415 | (p-,A-,C-,U-,p,-,-,-,-,-,protein)                        |
| H3' | C | 19726.1.1.6  | 4.961   | 4.559   | -0.402 | (p-,U-,C-,A-,p,-,-,-,-,-,protein)                        |
| H3' | U | 4120.1.1.22  | 4.947   | 4.437   | -0.51  | (pP,C-,U-,U-,p,-,-,tetra1,tetra2,tetra3,tetra4,-)        |
| H3' | U | 18336.1.1.5  | 7.842   | 4.523   | -3.319 | (Pp,CG,UA,U-,p,-,-,-,-,-)                                |
| H3' | U | 18656.1.1.7  | 5.267   | 4.694   | -0.573 | (P-,G-,U-,GC,pP,-,-,-,-,-)                               |
| H3' | U | 19662.1.1.13 | 5.175   | 4.618   | -0.557 | (Pp,CG,U-,A-,pP,-,-,-,-,-)                               |
| H3' | U | 19662.1.1.13 | 5.175   | 4.618   | -0.557 | (Pp,CG,U-,A-,pP,-,-,-,-,-)                               |
| H3' | U | 19726.1.1.8  | 3.675   | 4.612   | 0.937  | (p-,A-,U-,A-,p,-,-,-,-,-,protein)                        |
| C2  | A | 6652.1.1.21  | 152.452 | 154.473 | 2.021  | (Pp,G-,A-,A-,P-,-,multiplet,multiplet,gnra3,multiplet,-) |
| C2  | A | 6652.1.1.23  | 158.053 | 155.436 | -2.617 | (P-,A-,A-,CG,pP,multiplet,gnra3,multiplet,-,-,-)         |
| C2  | A | 15417.1.1.22 | 157.322 | 154.143 | -3.179 | (Pp,CG,A-,A-,pP,-,-,-,-,-)                               |
| C2  | A | 17106.1.1.29 | 152.054 | 154.769 | 2.715  | (P-,A-,A-,A-,P-,,-,-,-,-)                                |
| C2  | A | 17565.1.1.12 | 150.054 | 154.514 | 4.46   | (p-,A-,A-,GC,pP,-,-,-,-,-)                               |
| C2  | A | 17671.1.1.7  | 147.756 | 154.107 | 6.351  | (pP,CG,A-,UA,pP,-,-,-,-,-)                               |
| C8  | A | 4226.1.1.25  | 142.762 | 140.729 | -2.033 | (Pp,G-,A-,GC,pP,-,-,-,-,-)                               |
| C8  | A | 5919.1.1.9   | 139.068 | 141.701 | 2.633  | (p-,G-,A-,U-,P,-,-,-,-,-)                                |
| C8  | A | 5919.1.1.34  | 138.768 | 141.039 | 2.271  | (P-,A-,A-,A-,P-,,-,-,-,-)                                |
| C8  | A | 17106.1.1.25 | 143.054 | 140.845 | -2.209 | (pP,UA,A-,U-,P,-,-,-,-,-)                                |
| C8  | A | 17106.1.1.30 | 138.954 | 141.039 | 2.085  | (P-,A-,A-,A-,P,-,-,-,-,-)                                |
| C8  | A | 17671.1.1.7  | 142.546 | 140.299 | -2.247 | (pP,CG,A-,UA,pP,-,-,-,-,-)                               |

|    |   |              |         |         |        |                                                              |
|----|---|--------------|---------|---------|--------|--------------------------------------------------------------|
| C8 | A | 19040.1.1.48 | 142.698 | 140.681 | -2.017 | (pP,CG,A-,G-,P-,,-,-,-,-,-)                                  |
| C8 | G | 4345.1.1.24  | 141.78  | 139.172 | -2.608 | (pP,A-,G-,A-,P-,,-,-,-,-,-,protein)                          |
| C8 | G | 5007.1.1.16  | 136.941 | 139.794 | 2.853  | (p-,C-,G-,U-,p-,,-,-,-,-,-,-)                                |
| C8 | G | 5919.1.1.39  | 135.868 | 139.07  | 3.202  | (p-,A-,G-,CG,pP-,,-,-,-,-,-,-)                               |
| C8 | G | 5962.1.1.11  | 139.089 | 136.397 | -2.692 | (Pp,UA,GC,CG,Pp-,,-,-,-,-,-,-)                               |
| C8 | G | 11014.2.2.5  | 140.129 | 137.106 | -3.023 | (pP,GC,GC,UA,pP-,,-,-,-,kissing,kissing,-)                   |
| C8 | G | 15856.1.1.2  | 140.714 | 137.028 | -3.686 | (-,GC,GC,AU,Pp-,,-,-,-,-,-,-)                                |
| C8 | G | 15856.1.1.8  | 140.814 | 136.244 | -4.57  | (Pp,UA,GC,UG,P-,,-,-,-,-,-,-)                                |
| C8 | G | 15857.1.2.13 | 140.779 | 138.229 | -2.55  | (pP,U-,GC,GC,pP-,,-,multiplet,kissing,kissing,kissing,-)     |
| C8 | G | 15857.1.2.14 | 141.399 | 138.085 | -3.314 | (p-,GC,GC,CG,Pp,multiplet,kissing,kissing,kissing,kissing,-) |
| C8 | G | 15859.1.1.2  | 139.612 | 137.028 | -2.584 | (-,GC,GC,AU,Pp-,,-,-,-,-,-,-)                                |
| C8 | G | 18534.1.1.3  | 138.939 | 136.354 | -2.585 | (Pp,GU,GC,AU,pP-,,-,-,-,-,-,-)                               |
| C8 | G | 18549.1.1.1  | 143.838 | 139.028 | -4.81  | (-,GC,GC,Pp-,,-,-,-,-,-,-)                                   |
| C8 | G | 18656.1.1.4  | 143.468 | 137.946 | -5.522 | (Pp,CG,G-,A-,P-,,-,-,-,-,-,-)                                |
| C8 | G | 18891.1.1.2  | 139.659 | 136.825 | -2.834 | (-,GC,GC,CG,Pp-,,-,-,-,-,-,-)                                |
| C8 | G | 18894.1.1.8  | 140.938 | 136.244 | -4.694 | (Pp,UA,GC,UG,P-,,-,-,-,-,-,-)                                |
| C8 | G | 19018.1.1.1  | 136.496 | 139.036 | 2.54   | (-,GC,GC,pP-,,-,-,-,-,-,-)                                   |
| C8 | G | 19040.1.1.34 | 139.498 | 137.022 | -2.476 | (Pp,AU,GC,A-,p-,tetra5,-,multiplet,multiplet,multiplet,-)    |
| C8 | G | 19290.1.1.3  | 142.311 | 139.3   | -3.011 | (P-,U-,G-,U-,P-,,-,-,-,-,-,protein)                          |
| C5 | C | 5278.1.1.14  | 100.247 | 97.974  | -2.273 | (Pp,AU,CG,U-,pP-,,-,-,pseudoknot,-,pseudoknot,-)             |
| C5 | C | 6756.1.1.26  | 99.379  | 97.415  | -1.964 | (pP,UA,CG,CG-,,-,-,-,-,-,-)                                  |
| C5 | C | 17572.1.1.17 | 96.04   | 98.023  | 1.983  | (pP,CG,CG-,,-,-,-,-,-,-)                                     |
| C5 | C | 18336.1.1.4  | 95.164  | 97.327  | 2.163  | (Pp,AU,CG,UA,p-,,-,-,-,-,-,-)                                |
| C5 | C | 18336.1.1.8  | 96.132  | 98.217  | 2.085  | (p-,C-,C-,A-,p-,,-,-,-,-,-,-)                                |
| C5 | C | 18336.1.1.13 | 95.224  | 97.357  | 2.133  | (pP,GC,CG,U-,p-,,-,-,-,uncg1,uncg2,-)                        |
| C5 | C | 18336.1.1.16 | 96.629  | 98.626  | 1.997  | (p-,U-,C-,G-,Pp,uncg1,uncg2,uncg3,uncg4,uncg5,-)             |
| C5 | C | 18336.1.1.19 | 95.075  | 97.101  | 2.026  | (P-,GC,CG,AU,P-,uncg4,uncg5-,,-,-,-)                         |
| C5 | C | 18336.1.1.26 | 95.586  | 97.579  | 1.993  | (Pp,UA,CG,CG-,,-,-,-,-,-,-)                                  |
| C5 | C | 18534.1.1.8  | 96.179  | 98.059  | 1.88   | (Pp,CG,CG,AU,pP-,,-,-,-,-,-,-)                               |
| C5 | C | 18534.1.1.30 | 95.939  | 97.806  | 1.867  | (Pp,UA,CG,UG,pP-,,-,-,-,-,-,protein)                         |
| C5 | C | 19260.1.1.28 | 99.831  | 97.962  | -1.869 | (Pp,CG,CG,C-,p-,,-,-,-,-,-,-)                                |
| C5 | C | 19260.1.1.29 | 100.281 | 97.896  | -2.385 | (pP,CG,C-,C-,p-,,-,-,-,-,-,-)                                |
| C5 | C | 19260.1.1.37 | 100.081 | 98.064  | -2.017 | (p-,GC,C-,AU,Pp-,,-,multiplet,-,multiplet,multiplet,-)       |
| C5 | C | 19698.1.1.2  | 94.672  | 97.426  | 2.754  | (-,GC,CG,UA,pP-,,-,-,-,-,-,-)                                |
| C5 | C | 19698.1.1.17 | 95.618  | 97.489  | 1.871  | (pP,UG,CG,UA,pP-,,-,-,-,-,-,-)                               |
| C5 | C | 19698.1.1.21 | 96.144  | 98.147  | 2.003  | (pP,U-,CG,AU,pP-,,-,-,-,-,-,-)                               |
| C5 | C | 19698.1.1.23 | 94.586  | 97.001  | 2.415  | (pP,AU,CG,CG,Pp-,,-,-,-,-,-,-)                               |
| C5 | C | 19698.1.1.24 | 95.337  | 98.069  | 2.732  | (Pp,CG,CG,AU,Pp-,,-,-,-,-,-,-)                               |
| C5 | C | 19698.1.1.39 | 95.27   | 97.634  | 2.364  | (p-,GC,CG,GC,Pp-,,-,-,-,-,-,-)                               |
| C5 | C | 19698.1.1.50 | 95.99   | 98.085  | 2.095  | (Pp,CG,C-,A-,Pp-,,-,-,-,-,-,-)                               |

|     |   |              |         |         |        |                                                        |
|-----|---|--------------|---------|---------|--------|--------------------------------------------------------|
| C5  | U | 6652.1.1.5   | 101.489 | 104.272 | 2.783  | (Pp,AU,U-,A-,p-,,-,-,-,multiplet,-,-)                  |
| C5  | U | 17106.1.1.14 | 108.354 | 104.321 | -4.033 | (Pp,GC,U-,U-,P-,,-,-,-,-,-)                            |
| C5  | U | 17106.1.1.15 | 107.354 | 104.792 | -2.562 | (Pp,U-,U-,A-,p-,,-,-,-,-,-)                            |
| C5  | U | 17106.1.1.22 | 105.654 | 103.183 | -2.471 | (pP,CG,UA,CG,pP-,,-,-,-,-,-)                           |
| C5  | U | 17106.1.1.24 | 106.554 | 103.692 | -2.862 | (pP,CG,UA,A-,p-,,-,-,-,-,-)                            |
| C5  | U | 17106.1.1.26 | 109.354 | 104.539 | -4.815 | (pP,A-,U-,A-,P-,,-,-,-,-,-)                            |
| C5  | U | 19662.1.1.8  | 101.821 | 104.33  | 2.509  | (Pp,GC,U-,U-,Pp-,,-,-,-,-,-)                           |
| C5  | U | 19662.1.1.8  | 101.821 | 104.33  | 2.509  | (Pp,GC,U-,U-,Pp-,,-,-,-,-,-)                           |
| C5  | U | 19698.1.1.10 | 101.834 | 104.829 | 2.995  | (Pp,C-,U-,U-,P-,,-,-,-,-,-)                            |
| C5  | U | 19698.1.1.11 | 100.531 | 105.003 | 4.472  | (p-,U-,U-,A-,P-,,-,-,-,-,-)                            |
| C5  | U | 19698.1.1.15 | 101.193 | 103.736 | 2.543  | (P-,CG,UA,UG,pP-,,-,-,-,-,-)                           |
| C5  | U | 19698.1.1.19 | 101.001 | 103.462 | 2.461  | (pP,UA,UA,U-,pP-,,-,-,-,-,-)                           |
| C5  | U | 19698.1.1.43 | 99.301  | 104.815 | 5.514  | (Pp,A-,U-,A-,P-,,-,tetra1,tetra2,tetra3,tetra4,-)      |
| C6  | C | 4867.2.2.12  | 144.445 | 142.341 | -2.104 | (p-,C-,C-,G-,P-,,-,-,-,-,-,protein)                    |
| C6  | C | 4894.1.1.12  | 144.916 | 141.586 | -3.33  | (pP,CG,CG,CG,p-,,-,-,-,-,-,uncg1,-)                    |
| C6  | C | 4894.1.1.30  | 145.316 | 141.865 | -3.451 | (pP,CG,CG-,,-,-,-,-,-,-)                               |
| C6  | C | 5919.1.1.7   | 139.668 | 142.359 | 2.691  | (P-,A-,C-,G-,P-,,-,-,-,-,-)                            |
| C6  | C | 7405.1.1.18  | 146.326 | 141.736 | -4.59  | (Pp,CG,CG-,,-,-,-,-,-,-)                               |
| C6  | C | 15417.1.1.19 | 145.016 | 142.251 | -2.765 | (p-,C-,C-,GC,pP-,,-,-,-,-,-)                           |
| C6  | C | 15856.1.1.26 | 137.014 | 140.89  | 3.876  | (pP,AU,CG,UA,pP-,,-,-,-,-,-)                           |
| C6  | C | 17106.1.1.33 | 139.154 | 141.64  | 2.486  | (P-,A-,CG,UA,Pp-,,-,-,-,-,-)                           |
| C6  | C | 17316.1.1.43 | 138.372 | 141.619 | 3.247  | (p-,A-,CG,UA,pP-,,-,-,-,-,-)                           |
| C6  | C | 18336.1.1.7  | 140.246 | 142.593 | 2.347  | (pP,U-,C-,C-,P-,,-,-,-,-,-)                            |
| C6  | C | 18336.1.1.27 | 139.199 | 141.865 | 2.666  | (pP,CG,CG-,,-,-,-,-,-,-)                               |
| C6  | C | 19260.1.1.29 | 144.431 | 142.367 | -2.064 | (pP,CG,C-,C-,p-,,-,-,-,-,-)                            |
| C6  | C | 19260.1.1.37 | 145.031 | 142.657 | -2.374 | (p-,GC,C-,AU,Pp-,,-,multiplet,-,multiplet,multiplet,-) |
| C6  | C | 19534.1.1.21 | 143.555 | 141.238 | -2.317 | (Pp,CG,CG,AU,pP-,,-,-,-,-,-,protein)                   |
| C6  | C | 19534.1.1.47 | 143.309 | 141.119 | -2.19  | (pP,GC,CG,A-,P-,,-,-,-,-,-,protein)                    |
| C6  | U | 5919.1.1.37  | 140.368 | 143.221 | 2.853  | (P-,A-,U-,A-,P-,,-,-,-,-,-)                            |
| C6  | U | 7403.1.1.9   | 143.622 | 141.065 | -2.557 | (pP,CG,UG,G-,P-,,-,-,-,-,-,5prime-nc)                  |
| C6  | U | 7405.1.1.11  | 139.376 | 143.643 | 4.267  | (P-,U-,U-,A-,pP-,,-,-,-,-,-)                           |
| C6  | U | 15856.1.1.9  | 137.414 | 140.906 | 3.492  | (pP,GC,UG,A-,p-,,-,-,-,-,-)                            |
| C6  | U | 15857.1.2.9  | 137.549 | 141.337 | 3.788  | (pP,GC,UG,A-,pP-,,-,-,-,-,-,stacked,-,-)               |
| C6  | U | 15859.1.1.9  | 137.202 | 140.535 | 3.333  | (pP,GC,UG,G-,P-,,-,-,-,-,-,gnra1,gnra2,-)              |
| C6  | U | 17316.1.1.47 | 138.862 | 141.591 | 2.729  | (pP,AU,U-,G-,P-,,-,-,-,-,-)                            |
| C6  | U | 18549.1.1.11 | 140.398 | 143.13  | 2.732  | (P-,U-,U-,G-,P-,,-,-,-,-,-)                            |
| C6  | U | 18894.1.1.9  | 137.522 | 140.906 | 3.384  | (pP,GC,UG,A-,p-,,-,-,-,-,-)                            |
| C6  | U | 19698.1.1.11 | 140.345 | 143.749 | 3.404  | (p-,U-,U-,A-,P-,,-,-,-,-,-)                            |
| C1' | A | 4345.1.1.17  | 97.28   | 92.061  | -5.219 | (p-,A-,A-,GC,Pp,gnra2,gnra3,gnra4,gnra5,-,-)           |
| C1' | A | 4345.1.1.27  | 94.08   | 90.732  | -3.348 | (P-,G-,A-,UG,Pp-,,-,-,-,-,-,protein)                   |
| C1' | A | 5007.1.1.8   | 87.041  | 91.243  | 4.202  | (P-,A-,A-,GC,Pp-,,-,-,-,-,-)                           |

|     |   |              |        |        |        |                                                    |
|-----|---|--------------|--------|--------|--------|----------------------------------------------------|
| Cl' | A | 6652.1.1.6   | 86.836 | 91.448 | 4.612  | (Pp,U-,A-,U-,Pp,-,-,multiplet,-,multiplet,-)       |
| Cl' | A | 16230.1.1.5  | 86.93  | 90.304 | 3.374  | (P-,G-,A-,U-,,-,-,-,-,-,protein)                   |
| Cl' | A | 17106.1.1.27 | 86.991 | 90.756 | 3.765  | (P-,U-,A-,A-,P-,,-,-,-,-,-)                        |
| Cl' | A | 17106.1.1.29 | 94.551 | 90.968 | -3.583 | (P-,A-,A-,A-,P-,,-,-,-,-,-)                        |
| Cl' | A | 19662.1.1.14 | 95.334 | 91.845 | -3.489 | (pP,U-,A-,CG,pP,-,-,-,-,-,-)                       |
| Cl' | A | 19662.1.1.14 | 95.334 | 91.845 | -3.489 | (pP,U-,A-,CG,pP,-,-,-,-,-,-)                       |
| Cl' | A | 19698.1.1.51 | 87.106 | 91.469 | 4.363  | (pP,C-,A-,AU,Pp,-,-,-,-,-,-)                       |
| Cl' | G | 4345.1.1.26  | 85.58  | 89.971 | 4.391  | (P-,A-,G-,A-,pP,-,-,-,-,-,-,protein)               |
| Cl' | G | 4816.1.1.18  | 88.511 | 94.359 | 5.848  | (p-,C-,G-,GC,pP,uncg2,uncg3,uncg4,uncg5,-,-)       |
| Cl' | G | 4867.2.2.16  | 84.845 | 91.015 | 6.17   | (P-,AA,G-,UA,PP,-,-,multiplet,multiplet,-,protein) |
| Cl' | G | 5962.1.1.27  | 85.683 | 91.963 | 6.28   | (P-,C-,G-,UA,Pp,-,-,-,-,-,-)                       |
| Cl' | G | 6543.1.1.36  | 94.05  | 90.184 | -3.866 | (Pp,G-,G-,A-,Pp,-,-,-,-,-,-)                       |
| Cl' | G | 15417.1.1.20 | 87.037 | 93.179 | 6.142  | (p-,C-,GC,CG,P-,,-,-,-,-,-)                        |
| Cl' | G | 15538.1.1.14 | 88.258 | 91.626 | 3.368  | (pP,UG,G-,U-,P-,,-,-,gnra1,gnra2,gnra3,-)          |
| Cl' | G | 16230.1.1.2  | 86.632 | 90.179 | 3.547  | (-,A-,G-,A-,P-,,-,-,-,-,-,protein)                 |
| Cl' | G | 17316.1.1.21 | 85.192 | 90.944 | 5.752  | (P-,A-,G-,U-,P-,,-,-,-,-,-)                        |
| Cl' | G | 19260.1.1.34 | 85.061 | 92.072 | 7.011  | (p-,U-,GC,U-,Pp,-,multiplet,-,multiplet,-)         |
| Cl' | C | 4816.1.1.17  | 91.569 | 89.175 | -2.394 | (p-,U-,C-,G-,Pp,uncg1,uncg2,uncg3,uncg4,uncg5,-)   |
| Cl' | C | 4867.2.2.12  | 86.845 | 92.545 | 5.7    | (p-,C-,C-,G-,P-,,-,-,-,-,-,protein)                |
| Cl' | C | 5007.1.1.21  | 98.241 | 94.265 | -3.976 | (Pp,CG,CG,CG,p-,,-,-,-,-,-)                        |
| Cl' | C | 5007.1.1.23  | 95.141 | 92.46  | -2.681 | (pP,CG,C-,G-,P-,,-,-,-,-,-)                        |
| Cl' | C | 6756.1.1.27  | 90.385 | 92.904 | 2.519  | (pP,CG,CG,-,-,-,-,-,-)                             |
| Cl' | C | 15417.1.1.17 | 90.657 | 93.091 | 2.434  | (Pp,CG,C-,C-,p-,,-,-,-,-,-)                        |
| Cl' | C | 15417.1.1.19 | 87.158 | 92.743 | 5.585  | (p-,C-,C-,GC,pP,-,-,-,-,-,-)                       |
| Cl' | C | 18336.1.1.4  | 91.269 | 93.914 | 2.645  | (Pp,AU,CG,UA,p-,,-,-,-,-,-)                        |
| Cl' | C | 18336.1.1.7  | 89.907 | 92.364 | 2.457  | (pP,U-,C-,C-,P-,,-,-,-,-,-)                        |
| Cl' | C | 18336.1.1.13 | 90.953 | 93.731 | 2.778  | (pP,GC,CG,U-,p-,,-,-,-,uncg1,uncg2,-)              |
| Cl' | C | 18336.1.1.16 | 86.333 | 89.175 | 2.842  | (p-,U-,C-,G-,Pp,uncg1,uncg2,uncg3,uncg4,uncg5,-)   |
| Cl' | C | 18336.1.1.19 | 91.043 | 93.855 | 2.812  | (P-,GC,CG,AU,P-,uncg4,uncg5,-,-,-,-)               |
| Cl' | C | 18336.1.1.26 | 89.963 | 94.144 | 4.181  | (Pp,UA,CG,CG,-,-,-,-,-,-)                          |
| Cl' | C | 19260.1.1.28 | 91.061 | 94.258 | 3.197  | (Pp,CG,CG,C-,p-,,-,-,-,-,-)                        |
| Cl' | C | 19260.1.1.29 | 90.001 | 92.808 | 2.807  | (pP,CG,C-,C-,p-,,-,-,-,-,-)                        |
| Cl' | C | 19546.1.1.4  | 90.261 | 93.797 | 3.536  | (Pp,GU,CG,CG,Pp,-,-,-,-,-,-)                       |
| Cl' | C | 19634.1.1.38 | 89.614 | 92.062 | 2.448  | (p-,U-,C-,G-,p-,,-,-,-,-,-)                        |
| Cl' | U | 4816.1.1.25  | 89.777 | 93.118 | 3.341  | (Pp,C-,UA,UA,pP,-,-,-,-,-,-)                       |
| Cl' | U | 4867.2.2.17  | 96.745 | 92.493 | -4.252 | (PP,G-,UA,AG,Pp,-,multiplet,multiplet,-,protein)   |
| Cl' | U | 7405.1.1.15  | 90.156 | 93.593 | 3.437  | (pP,GC,UA,GC,pP,-,-,-,-,-,-)                       |
| Cl' | U | 16230.1.1.6  | 87.374 | 91.096 | 3.722  | (P-,A-,U-,,-,-,-,-,-,-,-,protein)                  |
| Cl' | U | 16431.1.1.8  | 89.325 | 92.324 | 2.999  | (Pp,AU,U-,U-,Pp,-,-,-,-,-,-)                       |
| Cl' | U | 17106.1.1.24 | 89.461 | 93.29  | 3.829  | (pP,CG,UA,A-,p-,,-,-,-,-,-)                        |
| Cl' | U | 17309.1.1.7  | 89.842 | 92.837 | 2.995  | (pP,CG,U-,U-,Pp,-,-,-,-,-,-)                       |

|     |   |              |        |        |        |                                                |
|-----|---|--------------|--------|--------|--------|------------------------------------------------|
| C1' | U | 17309.1.1.8  | 88.922 | 91.963 | 3.041  | (pP,U-,U-,GC,p-,,-,-,-,-,-)                    |
| C1' | U | 19260.1.1.35 | 88.591 | 92.227 | 3.636  | (p-,GC,U-,GC,p-,multiplet,-,-,multiplet,-,-)   |
| C1' | U | 19290.1.1.4  | 87.766 | 90.953 | 3.187  | (p-,G-,U-,G-,P-,,-,-,-,-,-,protein)            |
| C1' | U | 19662.1.1.13 | 89.181 | 92.658 | 3.477  | (Pp,CG,U-,A-,pP,-,-,-,-,-,-)                   |
| C1' | U | 19662.1.1.13 | 89.181 | 92.658 | 3.477  | (Pp,CG,U-,A-,pP,-,-,-,-,-,-)                   |
| C1' | U | 19698.1.1.11 | 94.815 | 91.424 | -3.391 | (p-,U-,U-,A-,P-,,-,-,-,-,-)                    |
| C2' | A | 4345.1.1.8   | 79.18  | 75.83  | -3.35  | (Pp,G-,A-,GC,pP,-,-,-,-,-,-,protein)           |
| C2' | A | 4345.1.1.25  | 79.58  | 76.449 | -3.131 | (P-,G-,A-,G-,P-,,-,-,-,-,-,protein)            |
| C2' | A | 6633.1.1.18  | 72.843 | 75.499 | 2.656  | (pP,UG,A-,C-,P-,,-,-,-,tetra1,tetra2,tetra3,-) |
| C2' | A | 16230.1.1.1  | 79.436 | 76.466 | -2.97  | (-,A-,G-,P-,,-,-,-,-,-)                        |
| C2' | A | 16230.1.1.3  | 79.667 | 76.449 | -3.218 | (P-,G-,A-,G-,P-,,-,-,-,-,-,protein)            |
| C2' | A | 17671.1.1.12 | 72.856 | 75.661 | 2.805  | (pP,G-,A-,U-,p-,,-,-,-,-,-)                    |
| C2' | A | 17671.1.1.24 | 72.666 | 75.567 | 2.901  | (Pp,GC,AU,UA,pP,-,-,-,-,-,-)                   |
| C2' | A | 18534.1.1.20 | 72.281 | 75.377 | 3.096  | (P-,GC,AU,AU,pP,tetra4,tetra5,-,-,-,-,protein) |
| C2' | A | 18894.1.1.10 | 73.105 | 75.757 | 2.652  | (Pp,UG,A-,U-,p-,,-,-,-,-,-)                    |
| C2' | A | 19040.1.1.48 | 83.398 | 76.488 | -6.91  | (pP,CG,A-,G-,P-,,-,-,-,-,-)                    |
| C2' | A | 19547.1.1.12 | 78.613 | 75.92  | -2.693 | (P-,G-,A-,A-,Pp,-,-,-,-,-,-)                   |
| C2' | G | 4345.1.1.9   | 79.38  | 75.234 | -4.146 | (P-,A-,GC,UG,Pp,-,-,-,-,-,-,protein)           |
| C2' | G | 4345.1.1.24  | 70.98  | 76.027 | 5.047  | (pP,A-,G-,A-,P-,,-,-,-,-,-,protein)            |
| C2' | G | 4346.1.1.7   | 78.673 | 75.779 | -2.894 | (pP,GU,G-,A-,Pp,-,-,-,-,-,-,protein)           |
| C2' | G | 4867.2.2.13  | 71.445 | 75.47  | 4.025  | (p-,C-,G-,A-,PP,-,-,-,-,-,-,protein)           |
| C2' | G | 15257.1.1.11 | 79.072 | 75.911 | -3.161 | (p-,G-,G-,A-,p-,,-,-,-,-,-)                    |
| C2' | G | 16230.1.1.2  | 80.164 | 76.069 | -4.095 | (-,A-,G-,A-,P-,,-,-,-,-,-,protein)             |
| C2' | G | 16230.1.1.4  | 79.308 | 76.076 | -3.232 | (P-,A-,G-,A-,p-,,-,-,-,-,-,protein)            |
| C2' | G | 17316.1.1.21 | 78.682 | 75.839 | -2.843 | (P-,A-,G-,U-,P-,,-,-,-,-,-)                    |
| C2' | G | 18549.1.1.1  | 77.788 | 75.157 | -2.631 | (-,GC,GC,Pp,-,-,-,-,-,-)                       |
| C2' | G | 18894.1.1.4  | 72.573 | 75.275 | 2.702  | (Pp,AU,GC,UA,Pp,-,-,-,-,-,-)                   |
| C2' | G | 18894.1.1.8  | 72.415 | 75.287 | 2.872  | (Pp,UA,GC,UG,P-,,-,-,-,-,-)                    |
| C2' | G | 19260.1.1.34 | 72.551 | 75.18  | 2.629  | (p-,U-,GC,U-,Pp,-,multiplet,-,-,multiplet,-)   |
| C2' | G | 19290.1.1.9  | 72.632 | 75.73  | 3.098  | (P-,U-,G-,A-,P-,,-,-,-,-,-,protein)            |
| C2' | G | 19544.1.1.12 | 79.059 | 75.911 | -3.148 | (p-,G-,G-,A-,p-,,-,-,-,-,-)                    |
| C2' | G | 19546.1.1.12 | 79.059 | 76.088 | -2.971 | (P-,G-,G-,A-,p-,,-,-,-,-,-)                    |
| C2' | G | 19547.1.1.11 | 78.993 | 76.113 | -2.88  | (P-,G-,G-,A-,P-,,-,-,-,-,-)                    |
| C2' | G | 19548.1.1.11 | 79.056 | 76.088 | -2.968 | (P-,G-,G-,A-,p-,,-,-,-,-,-)                    |
| C2' | G | 19634.1.1.13 | 77.994 | 75.375 | -2.619 | (pP,GU,GC,U-,pP,-,-,-,-,-,-)                   |
| C2' | C | 4867.2.2.10  | 72.045 | 75.666 | 3.621  | (P-,U-,C-,C-,p-,,-,-,-,-,-,protein)            |
| C2' | C | 5655.1.1.5   | 72.411 | 75.501 | 3.09   | (pP,UA,CG,CG,pP,-,-,-,-,-,-)                   |
| C2' | C | 5655.1.1.7   | 71.935 | 75.017 | 3.082  | (pP,CG,CG,CG,p-,,-,-,-,-,-,5prime-nc)          |
| C2' | C | 6562.1.1.18  | 84.701 | 77.467 | -7.234 | (Pp,UG,CG,-,-,-,-,-,-)                         |
| C2' | C | 7098.1.1.25  | 72.009 | 75.354 | 3.345  | (Pp,GC,CG,AU,Pp,-,-,-,-,-,-)                   |
| C2' | C | 7403.1.1.7   | 72.288 | 75.417 | 3.129  | (pP,GC,CG,CG,pP,-,-,-,-,-,-)                   |



|     |   |              |        |        |        |                                                                      |
|-----|---|--------------|--------|--------|--------|----------------------------------------------------------------------|
| C2' | C | 7403.1.1.19  | 71.985 | 75.311 | 3.326  | (Pp,GC,CG,AU,pP,-,-,-,-,-)                                           |
| C2' | C | 7405.1.1.3   | 72.186 | 75.311 | 3.125  | (Pp,GC,CG,AU,pP,-,-,-,-,-)                                           |
| C2' | C | 17941.1.1.27 | 85.054 | 77.467 | -7.587 | (Pp,UG,CG,-,-,-,-,-)                                                 |
| C2' | C | 17972.1.1.3  | 72.85  | 75.374 | 2.524  | (Pp,GC,CG,UA,p,-,-,-,-,-)                                            |
| C2' | C | 18894.1.1.17 | 72.503 | 76.15  | 3.647  | (p-,A-,C-,U-,P,-,-,-,-,-)                                            |
| C2' | C | 19260.1.1.22 | 70.071 | 74.935 | 4.864  | (pP,UA,CG,CG,Pp,multiplet,multiplet,multiplet,-,-,5prime-nc)         |
| C2' | U | 4867.2.2.17  | 72.545 | 74.751 | 2.206  | (PP,G-,UA,AG,Pp,-,multiplet,multiplet,-,protein)                     |
| C2' | U | 5655.1.1.9   | 72.314 | 75.845 | 3.531  | (pP,CG,U-,G-,p,-,-,-,-,-)                                            |
| C2' | U | 6633.1.1.17  | 72.643 | 75.269 | 2.626  | (pP,CG,UG,A-,p,-,-,-,tetra1,tetra2,-)                                |
| C2' | U | 15417.1.1.24 | 73.281 | 75.304 | 2.023  | (P-,A-,UA,UA,pP,-,-,-,-,-)                                           |
| C2' | U | 16431.1.1.8  | 73.675 | 75.747 | 2.072  | (Pp,AU,U-,U-,Pp,-,-,-,-,-)                                           |
| C2' | U | 17106.1.1.26 | 73.371 | 75.608 | 2.237  | (pP,A-,U-,A-,P,-,-,-,-,-)                                            |
| C2' | U | 17671.1.1.8  | 82.096 | 75.232 | -6.864 | (pP,A-,UA,UA,pP,-,-,-,-,-)                                           |
| C2' | U | 18534.1.1.5  | 72.191 | 75.374 | 3.183  | (Pp,AU,UA,AU,pP,-,-,-,-,-)                                           |
| C2' | U | 18894.1.1.27 | 72.433 | 75.276 | 2.843  | (Pp,CG,UA,CG,pP,-,-,-,-,-)                                           |
| C2' | U | 19260.1.1.19 | 70.551 | 73.552 | 3.001  | (pP,UA,UA,UA,pP,multiplet,multiplet,multiplet,multiplet,multiplet,-) |
| C3' | A | 4867.2.2.7   | 79.445 | 74.811 | -4.634 | (PP,AU,AA,A-,p,-,multiplet,-,protein)                                |
| C3' | A | 4867.2.2.14  | 80.545 | 75.84  | -4.705 | (p-,G-,A-,AA,P,-,-,-,-,multiplet,protein)                            |
| C3' | A | 15745.1.1.11 | 79.247 | 74.002 | -5.245 | (Pp,CG,A-,G-,Pp,-,-,-,-,-)                                           |
| C3' | A | 17106.1.1.25 | 80.221 | 74.369 | -5.852 | (pP,UA,A-,U-,P,-,-,-,-,-)                                            |
| C3' | A | 18549.1.1.16 | 69.738 | 74.747 | 5.009  | (P-,A-,A-,AU,pP,-,-,-,-,-)                                           |
| C3' | A | 19040.1.1.48 | 79.998 | 74.261 | -5.737 | (pP,CG,A-,G-,P,-,-,-,-,-)                                            |
| C3' | A | 19260.1.1.48 | 69.831 | 74.22  | 4.389  | (p-,UA,A-,,-,-,-,-,-)                                                |
| C3' | A | 19290.1.1.7  | 79.964 | 75.467 | -4.497 | (P-,A-,A-,U-,P,-,-,-,-,-,protein)                                    |
| C3' | G | 4345.1.1.7   | 79.48  | 75.374 | -4.106 | (pP,GU,G-,A-,Pp,-,-,-,-,-,protein)                                   |
| C3' | G | 4345.1.1.26  | 81.58  | 75.636 | -5.944 | (P-,A-,G-,A-,pP,-,-,-,-,-,protein)                                   |
| C3' | G | 4780.1.1.9   | 80.366 | 76.077 | -4.289 | (pP,G-,G-,U-,P,-,-,-,-,-)                                            |
| C3' | G | 4781.2.2.9   | 80.652 | 76.186 | -4.466 | (pP,G-,G-,U-,P,-,-,-,-,-,protein)                                    |
| C3' | G | 4867.2.2.13  | 80.845 | 76.137 | -4.708 | (p-,C-,G-,A-,PP,-,-,-,-,-,protein)                                   |
| C3' | G | 4867.2.2.16  | 80.745 | 75.461 | -5.284 | (P-,AA,G-,UA,PP,-,multiplet,multiplet,-,protein)                     |
| C3' | G | 15257.1.1.10 | 79.817 | 75.941 | -3.876 | (P-,C-,G-,G-,P,-,-,-,-,-)                                            |
| C3' | G | 15745.1.1.12 | 79.267 | 74.999 | -4.268 | (pP,A-,G-,GC,p,-,-,-,-,-)                                            |
| C3' | G | 16230.1.1.4  | 79.832 | 75.887 | -3.945 | (P-,A-,G-,A-,p,-,-,-,-,-,protein)                                    |
| C3' | G | 18549.1.1.1  | 70.098 | 74.544 | 4.446  | (-,GC,GC,Pp,-,-,-,-,-)                                               |
| C3' | G | 18838.1.1.10 | 72.128 | 76.275 | 4.147  | (p-,U-,G-,G-,P,-,-,-,-,-)                                            |
| C3' | G | 18838.1.1.11 | 71.938 | 76.351 | 4.413  | (p-,G-,G-,A-,P,-,-,-,-,-)                                            |
| C3' | G | 19018.1.1.1  | 69.936 | 74.552 | 4.616  | (-,GC,GC,pP,-,-,-,-,-)                                               |
| C3' | G | 19546.1.1.11 | 79.809 | 75.783 | -4.026 | (P-,A-,G-,G-,P,-,-,-,-,-)                                            |
| C3' | C | 4867.2.2.12  | 79.145 | 74.718 | -4.427 | (p-,C-,C-,G-,P,-,-,-,-,-,protein)                                    |
| C3' | C | 6562.1.1.18  | 77.795 | 70.134 | -7.661 | (Pp,UG,CG,-,-,-,-,-)                                                 |

|     |   |              |        |        |        |                                     |
|-----|---|--------------|--------|--------|--------|-------------------------------------|
| C3' | C | 7404.1.1.7   | 81.719 | 72.479 | -9.24  | (pP,GC,CG,CG,p,-,-,-,-,-)           |
| C3' | C | 15417.1.1.18 | 82.141 | 73.89  | -8.251 | (pP,C-,C-,C-,Pp,-,-,-,-,-)          |
| C3' | C | 15745.1.1.10 | 77.997 | 72.654 | -5.343 | (Pp,GC,CG,A-,P-,,-,-,-,-,5prime-nc) |
| C3' | C | 16431.1.1.28 | 78.195 | 70.134 | -8.061 | (Pp,UG,CG,-,-,-,-,-,-,-)            |
| C3' | C | 17520.1.1.17 | 74.047 | 69.738 | -4.309 | (pP,CG,CG,-,-,-,-,-,-,-)            |
| C3' | C | 17564.1.1.9  | 69.493 | 74.764 | 5.271  | (p-,U-,C-,C-,p,-,-,-,-,-,-)         |
| C3' | C | 17565.1.1.10 | 70.334 | 74.617 | 4.283  | (p-,C-,C-,A-,P-,,-,-,-,-,-)         |
| C3' | C | 17941.1.1.27 | 77.662 | 70.134 | -7.528 | (Pp,UG,CG,-,-,-,-,-,-,-)            |
| C3' | C | 19634.1.1.38 | 79.724 | 75.164 | -4.56  | (p-,U-,C-,G-,p,-,-,-,-,-,-)         |
| C3' | U | 7405.1.1.15  | 78.276 | 72.308 | -5.968 | (pP,GC,UA,GC,pP,-,-,-,-,-,-)        |

<sup>1</sup>This table lists the shift values that were automatically removed during the model training process. Values in the **Atom** column are the name of the atom that was predicted. The values in the **Base** column are the type of nucleotide. The value in the **ID** column represents the BMRB entry number, shift set, and residue number. The values in the **Measured** column represent experimentally measured chemical shifts (after re-referencing). The values in the **Predicted** column represent the predicted chemical shift. The values in the **Delta** column represent the deviation between measured and predicted values. The values in the **Attributes** column represent the attributes assigned to that atom.

Table S2 Data files<sup>1</sup>

| <b>BMRB</b> | <b>PDB</b> | <b>Mode</b> | <b>Used</b> | <b>Reason</b>  |
|-------------|------------|-------------|-------------|----------------|
| xxx1        | -          | Manual      | Yes         |                |
| xxx2        | -          | Manual      | Yes         |                |
| xxx3        | -          | Manual      | Yes         |                |
| xxx4        | -          | Manual      | Yes         |                |
| xxx5        | -          | Manual      | Yes         |                |
| xxx6        | -          | Manual      | Yes         |                |
| 4028        | Missing    | -           | No          |                |
| 4120        | 1A60       | Auto        | Yes         |                |
| 4125        | -          | Manual      | Yes         |                |
| 4135        | -          | Manual      | Yes         |                |
| 4175        | 1BN0       | Auto        | Yes         |                |
| 4226        | 1LDZ       | Auto        | Yes         |                |
| 4247        | missing    | -           | No          |                |
| 4250        | 3PHP       | Auto        | Yes         |                |
| 4253        | missing    | -           | No          |                |
| 4345        | -          | Manual      | Yes         |                |
| 4346        | -          | Manual      | Yes         |                |
| 4547        | 1C2Q       | Auto        | No          | DNA-RNA hybrid |
| 4614        | 1F5G       | Auto        | Yes         |                |
| 4745        | 1K8S       | Auto        | Yes         |                |
| 4750        | -          | Manual      | Yes         |                |
| 4780        | -          | Manual      | Yes         |                |
| 4781        | -          | Manual      | Yes         |                |
| 4816        | 1JO7       | Auto        | Yes         |                |
| 4867        | -          | Manual      | Yes         |                |
| 4894        | 1EKZ       | Auto        | Yes         |                |
| 5007        | 1HWQ       | Auto        | Yes         |                |
| 5023        | 1I4C       | Auto        | Yes         |                |
| 5046        | -          | Manual      | Yes         |                |
| 5170        | 1JU7       | Auto        | Yes         |                |
| 5193        | 1JZC       | Auto        | Yes         |                |
| 5256        | 1KKA       | Auto        | Yes         |                |
| 5259        | -          | Manual      | Yes         |                |
| 5278        | -          | Manual      | Yes         |                |
| 5321        | 1L1W       | Auto        | Yes         |                |
| 5371        | 1LC6       | Auto        | Yes         |                |
| 5394        | 1LPW       | Auto        | Yes         |                |
| 5395        | 1LMV       | Auto        | Yes         |                |
| 5528        | 1M82       | Auto        | Yes         |                |
| 5530        | 1LUX       | Auto        | Yes         |                |
| 5531        | 1LUU       | Auto        | Yes         |                |
| 5553        | 1MFY       | Auto        | Yes         |                |
| 5559        | -          | Manual      | Yes         |                |
| 5586        | 1MV1       | Auto        | Yes         |                |
| 5587        | 1MV2       | Auto        | Yes         |                |
| 5588        | -          | Manual      | Yes         |                |
| 5614        | 1MUV       | Auto        | Yes         |                |
| 5632        | 1NA2       | Auto        | Yes         |                |

|       |          |         |     |          |
|-------|----------|---------|-----|----------|
| 5655  | INC0     | Auto    | Yes |          |
| 5703  | -        | Manual  | Yes |          |
| 5705  | 2KOC     | Auto    | Yes |          |
| 5773  | 1N8X     | Auto    | Yes |          |
| 5775  | 1NTQ     | Auto    | No  | No Match |
| 5776  | 1NTS     | Auto    | No  | No Match |
| 5777  | 1NTT     | Auto    | No  | No Match |
| 5781  | 1OO7     | Auto    | No  | No Match |
| 5834  | 1PJY     | Auto    | Yes |          |
| 5852  | 1OW9     | Auto    | Yes |          |
| 5919  | 1MNX     | Auto    | Yes |          |
| 5932  | 1Q75     | Auto    | Yes |          |
| 5962  | -        | Manual  | Yes |          |
| 5980  | -        | Manual  | Yes |          |
| 6005  | 1RGO     | Auto    | Yes |          |
| 6042  | 1RFR     | Auto    | No  | No Match |
| 6062  | 1S2F     | Auto    | Yes |          |
| 6076  | 1R7W     | Auto    | Yes |          |
| 6077  | 1R7Z     | Auto    | Yes |          |
| 6094  | -        | Manual  | Yes |          |
| 6115  | -        | Manual  | Yes |          |
| 6239  | -        | Manual  | Yes |          |
| 6320  | 1XHP     | Auto    | Yes |          |
| 6477  | 1YMO     | Auto    | Yes |          |
| 6485  | -        | Manual  | Yes |          |
| 6509  | -        | Manual  | Yes |          |
| 6543  | 1Z2J     | Auto    | Yes |          |
| 6562  | 1Z30     | Auto    | Yes |          |
| 6633  | 1ZC5     | Auto    | Yes |          |
| 6652  | 2ADT     | Auto    | Yes |          |
| 6756  | -        | Manual  | Yes |          |
| 6814  | 2AU4     | Auto    | No  | No Match |
| 6895  | missing  | -       | No  |          |
| 6922  | missing  | -       | No  |          |
| 6956  | -        | Manual  | Yes |          |
| 6979  | missing  | -       | No  |          |
| 7090  | -        | Manual  | Yes |          |
| 7098  | 2GM0     | Auto    | Yes |          |
| 7194  | missing  | -       | No  |          |
| 7230  | 2H49     | Auto    | Yes |          |
| 7307  | missing  | -       | No  |          |
| 7308  | missing  | -       | No  |          |
| 7314  | 2.00E+34 | No DSSR | No  |          |
| 7315  | 2.00E+35 | No DSSR | No  |          |
| 7403  | 2QH2     | Auto    | Yes |          |
| 7404  | 2QH3     | Auto    | Yes |          |
| 7405  | 2QH4     | Auto    | Yes |          |
| 10014 | 2F87     | Auto    | Yes |          |
| 10018 | 2FDT     | Auto    | Yes |          |
| 11014 | -        | Manual  | Yes |          |
| 11374 | 2RNE     | No DSSR | No  |          |
| 11375 | 2RNE     | No DSSR | No  |          |
| 11406 | 2rq4     | No DSSR | No  |          |

|       |         |         |     |              |
|-------|---------|---------|-----|--------------|
| 11407 | 2rq4    | No DSSR | No  |              |
| 11408 | 2rq4    | No DSSR | No  |              |
| 11409 | 2rra    | Auto    | No  | No Match     |
| 11410 | 2rra    | Auto    | No  | No Match     |
| 11411 | 2rra    | Auto    | No  | No Match     |
| 11412 | 2rra    | Auto    | No  | No Match     |
| 11450 | 2RS2    | Auto    | No  | No Match     |
| 11489 | 2RSK    | Auto    | Yes |              |
| 15080 | -       | Manual  | Yes |              |
| 15081 | 2O32    | Auto    | No  | Non-standard |
| 15113 | 2IHX    | Auto    | Yes |              |
| 15117 | 1ns1    | No DSSR | No  |              |
| 15157 | 2OJ7    | Auto    | No  | Small        |
| 15257 | 2JPP    | Auto    | Yes |              |
| 15319 | 2JR4    | Auto    | Yes |              |
| 15331 | -       | Manual  | Yes |              |
| 15342 | -       | Manual  | Yes |              |
| 15362 | -       | Manual  | Yes |              |
| 15417 | 2JTP    | Auto    | Yes |              |
| 15538 | -       | Manual  | Yes |              |
| 15543 | 2JX2    | No DSSR | No  |              |
| 15571 | 2JXQ    | Auto    | Yes |              |
| 15572 | 2JXS    | Auto    | Yes |              |
| 15656 | -       | Manual  | Yes |              |
| 15697 | missing | -       | No  |              |
| 15727 | missing | -       | No  |              |
| 15745 | 2JYM    | Auto    | Yes |              |
| 15780 | 2K3Z    | Auto    | Yes |              |
| 15781 | 2K41    | Auto    | Yes |              |
| 15786 | -       | Manual  | Yes |              |
| 15856 | -       | Manual  | Yes |              |
| 15857 | -       | Manual  | Yes |              |
| 15858 | -       | Manual  | Yes |              |
| 15859 | -       | Manual  | Yes |              |
| 15869 | -       | Manual  | Yes |              |
| 15915 | 2K7E    | Auto    | Yes |              |
| 16192 | 2HGL    | No DSSR | No  |              |
| 16193 | 2HGM    | No DSSR | No  |              |
| 16194 | 2HGN    | No DSSR | No  |              |
| 16230 | 2KH9    | Auto    | Yes |              |
| 16244 | 2KH9    | Auto    | No  |              |
| 16425 | 2KM8    | Auto    | No  |              |
| 16431 | 2KMJ    | Auto    | Yes |              |
| 16479 | -       | Manual  | Yes |              |
| 16604 | missing | -       | No  |              |
| 16609 | missing | -       | No  |              |
| 16654 | -       | Manual  | Yes |              |
| 16655 | 2KRZ    | Auto    | Yes |              |
| 16714 | 2Y95    | Auto    | No  | Multiple     |
| 16852 | 2KWG    | Auto    | No  | Non-standard |
| 16877 | -       | Manual  | Yes |              |
| 16920 | 2KXN    | Auto    | Yes |              |
| 16941 | -       | Manual  | Yes |              |

|       |         |         |     |                |
|-------|---------|---------|-----|----------------|
| 16950 | 2KXZ    | Auto    | No  | Multiple       |
| 16951 | 2KY0    | Auto    | Yes |                |
| 16952 | 2KY1    | Auto    | Yes |                |
| 16953 | 2KY2    | Auto    | Yes |                |
| 16980 | -       | Manual  | Yes |                |
| 17078 | missing | -       | No  |                |
| 17083 | 2L1F    | Auto    | Yes |                |
| 17088 | 2kye    | Auto    | Yes |                |
| 17106 | -       | Manual  | Yes |                |
| 17188 | 2L3E    | Auto    | Yes |                |
| 17273 | -       | Manual  | No  |                |
| 17292 | 2L5Z    | Auto    | Yes |                |
| 17309 | 2L6I    | Auto    | Yes |                |
| 17316 | 2KZL    | Auto    | Yes |                |
| 17326 | missing | -       | No  |                |
| 17401 | 2L8U    | Auto    | Yes |                |
| 17406 | 2L8F    | Auto    | Yes |                |
| 17408 | 2L8H    | Auto    | Yes |                |
| 17436 | 1Z2J    | Auto    | Yes |                |
| 17449 | -       | Manual  | Yes |                |
| 17504 | 2LA5    | Auto    | Yes |                |
| 17517 | 2LA9    | Auto    | Yes |                |
| 17520 | 2LAC    | Auto    | Yes |                |
| 17526 | 1EY1    | No DSSR | No  |                |
| 17535 | 2LAR    | Auto    | No  | DNA/RNA hybrid |
| 17559 | missing | -       | No  |                |
| 17560 | missing | -       | No  |                |
| 17563 | 2LBJ    | Auto    | Yes |                |
| 17564 | 2LBK    | Auto    | Yes |                |
| 17565 | 2LBL    | Auto    | Yes |                |
| 17566 | missing | -       | No  |                |
| 17567 | missing | -       | No  |                |
| 17568 | missing | -       | No  |                |
| 17572 | 2LBQ    | Auto    | Yes |                |
| 17573 | 2LBR    | Auto    | Yes |                |
| 17601 | 2LC8    | Auto    | No  | No Match       |
| 17623 | 2YH1    | Auto    | No  | No Match       |
| 17671 | -       | Manual  | Yes |                |
| 17682 | 2LDT    | Auto    | Yes |                |
| 17706 | 21ea    | no URL  | No  |                |
| 17707 | 21eb    | no URL  | No  |                |
| 17860 | 2LHP    | Auto    | Yes |                |
| 17861 | missing | -       | No  |                |
| 17877 | 2LI4    | Auto    | Yes |                |
| 17883 | 2CQF    | No DSSR | No  |                |
| 17901 | -       | Manual  | Yes |                |
| 17921 | -       | No DSSR | No  |                |
| 17941 | 2LJJ    | Auto    | Yes |                |
| 17961 | 2LKR    | Auto    | Yes |                |
| 17972 | 2LK3    | Auto    | Yes |                |
| 18034 | 4A4T    | Auto    | Yes |                |
| 18035 | 4A4U    | Auto    | Yes |                |
| 18036 | 4A4S    | Auto    | Yes |                |

|       |      |        |     |                      |
|-------|------|--------|-----|----------------------|
| 18079 | 4A4R | Auto   | Yes |                      |
| 18239 | 2LP9 | Auto   | Yes |                      |
| 18240 | 2LPA | Auto   | Yes |                      |
| 18336 | 2LQZ | Auto   | Yes |                      |
| 18503 | 2LU0 | Auto   | Yes |                      |
| 18515 | 2LUB | Auto   | Yes |                      |
| 18532 | 2LUN | Auto   | Yes |                      |
| 18534 | 2LUP | Auto   | Yes |                      |
| 18549 | 2LV0 | Auto   | Yes |                      |
| 18593 | 2LVY | Auto   | Yes |                      |
| 18633 | 2LWK | Auto   | Yes |                      |
| 18656 | 2LX1 | Auto   | Yes |                      |
| 18702 | 4B8T | Auto   | No  | No Match             |
| 18838 | 2M12 | Auto   | Yes |                      |
| 18846 | -    | Auto   | No  |                      |
| 18847 | 2M18 | Auto   | Yes |                      |
| 18872 | 2M1O | Auto   | Yes |                      |
| 18881 | 2M1V | Auto   | No  | No Match             |
| 18891 | 2M21 | Auto   | Yes |                      |
| 18892 | 2M22 | Auto   | Yes |                      |
| 18893 | 2M23 | Auto   | Yes |                      |
| 18894 | 2M24 | Auto   | Yes |                      |
| 18950 | 2M39 | Auto   | No  | Non-standard linkage |
| 18974 | 2MER | Auto   | Yes |                      |
| 18975 | 2MEQ | Auto   | Yes |                      |
| 19018 | 2M4Q | Auto   | Yes |                      |
| 19024 | 2M4W | Auto   | Yes |                      |
| 19039 | 2M57 | Auto   | Yes |                      |
| 19040 | 2M58 | Auto   | Yes |                      |
| 19064 | -    | Auto   | No  |                      |
| 19081 | 2M5U | Auto   | Yes |                      |
| 19248 | 2M8D | Auto   | Yes |                      |
| 19260 | 2M8K | Auto   | Yes |                      |
| 19290 | 4BS2 | Auto   | Yes |                      |
| 19382 | 2MB0 | Auto   | Yes |                      |
| 19400 | 4BY9 | Auto   | No  | No Match             |
| 19534 | 2MF0 | Auto   | Yes |                      |
| 19544 | 2MFC | Auto   | Yes |                      |
| 19546 | 2MFE | Auto   | Yes |                      |
| 19547 | 2MFF | Auto   | Yes |                      |
| 19548 | 2MFG | Auto   | Yes |                      |
| 19549 | 2MFH | Auto   | Yes |                      |
| 19634 | 2MHI | Auto   | Yes |                      |
| 19662 | 2MI0 | Auto   | Yes |                      |
| 19692 | 2MIS | Auto   | Yes |                      |
| 19698 | -    | Manual | Yes |                      |
| 19726 | 2MJH | Auto   | Yes |                      |

<sup>1</sup>Values in the **BMRB** column are BMRB entry numbers for entries with RNA. Entries prefixed with xxx are local datasets that have not yet been deposited. The values in the **PDB** column represent Protein Data Bank entries that were identified as corresponding to the BMRB entry in the same row. A dash indicates that we used a manual template and did not need to look for the PDB entry. A value of *missing* indicates that our scripts were unable to find a PDB entry in the STAR file. The **Template** column values are Auto where the attributes for that BMRB entry were generated automatically and manual where we created a manual template for the entry. Other entries indicate a reason why the entry was not used. *No DSSR* indicates

that DSSR program did not run successfully with the indicated PDB entry. The value in the **Used** column indicate whether shifts for that entry were actually used in the analysis. The value in the **Reason** column indicates a reason why an entry, despite having a valid PDB file identified was not used. *No Match* indicates that our scripts did not find an exact match between the NMR-STAR file sequence and the PDB file sequence. *Multiple* indicates that the STAR file had multiple shift sets and the one that was automatically matched did not have sufficient useful shifts. *Non-standard* indicates that the sequence was largely composed of non-standard nucleotides or nucleotide linkages.
